# Supplementary material
Source: publisher figshare collection journal article supplement (https://frontiersin.figshare.com/ndownloader/files/11255402)
Supplement: Supplementary file 1 [file 11255402]

Raw Symbiont Counts
	NS_T25	NS_Control	FR_P324	FR_P604	FR_P2553	NS_P324	NS_P604	NS_P2553	FR_T25	FR_Control
isogroup427488	1	0	9	7	4	1	0	0	2	6
isogroup352712	2	0	0	13	1	1	10	0	1	2
isogroup335848	2	0	5	7	1	3	1	0	8	3
isogroup102625	2	1	5	6	1	1	1	0	10	3
isogroup4169	2	2	5	8	1	2	1	1	4	4
isogroup319152	3	0	3	12	2	0	4	0	2	4
isogroup311207	3	0	4	8	1	3	4	0	5	2
isogroup214863	3	1	5	1	3	4	1	4	4	4
isogroup357477	3	2	3	7	1	1	2	0	9	2
isogroup239723	3	2	4	5	1	1	2	5	1	6
isogroup318883	3	2	5	14	1	0	1	0	2	2
isogroup124051	3	2	7	3	1	0	3	2	3	6
isogroup178607	3	3	6	7	1	2	1	0	4	3
isogroup191309	3	4	6	1	4	5	1	1	3	2
isogroup2125	4	0	2	9	2	2	3	0	3	5
isogroup333920	4	0	7	6	0	2	0	1	4	6
isogroup323733	4	0	7	8	0	1	1	0	4	5
isogroup313862	4	1	1	4	2	6	2	2	6	2
isogroup315294	4	1	3	8	2	3	1	1	3	4
isogroup202576	4	1	4	5	2	2	1	5	3	3
isogroup324769	4	1	5	7	0	3	1	2	4	3
isogroup13438	4	1	6	8	0	1	2	1	5	2
isogroup63660	4	2	4	9	0	1	8	0	0	2
isogroup187911	4	2	5	5	2	4	0	0	7	1
isogroup238499	4	3	1	4	3	6	3	1	1	4
isogroup223380	4	4	3	1	1	5	3	6	1	2
isogroup170862	4	6	7	1	0	3	1	4	0	4
isogroup311777	5	0	4	8	1	1	1	1	5	4
isogroup50845	5	0	8	10	0	0	0	1	4	2
isogroup320984	5	0	10	3	2	1	0	1	5	3
isogroup308772	5	1	2	8	0	2	4	0	6	2
isogroup339000	5	1	4	3	1	3	2	3	4	4
isogroup322303	5	1	4	6	1	2	3	1	6	1
isogroup153532	5	1	4	6	2	4	1	0	7	0
isogroup343514	5	1	5	6	0	2	0	1	8	2
isogroup308489	5	1	5	7	0	1	2	1	5	3
isogroup74170	5	1	6	5	0	0	2	0	6	5
isogroup333790	5	1	7	8	0	2	1	2	1	3
isogroup340581	5	1	11	4	0	2	1	0	5	1
isogroup330092	5	1	11	5	1	0	1	0	4	2
isogroup112	5	2	4	7	0	2	2	0	4	4
isogroup334152	5	2	8	3	0	0	1	2	5	4
isogroup316918	5	2	8	4	2	1	0	0	4	4
isogroup20817	5	3	5	7	0	0	2	1	5	2
isogroup200283	5	4	1	2	1	4	1	5	6	1
isogroup343965	6	0	5	4	2	4	3	0	2	4
isogroup76882	6	0	6	5	2	1	3	0	6	1
isogroup83090	6	0	7	8	0	2	1	1	5	0
isogroup340238	6	0	8	6	1	1	0	0	5	3
isogroup81021	6	1	3	7	2	0	3	0	6	2
isogroup2151	6	1	4	7	0	0	0	1	8	3
isogroup334529	6	1	4	12	0	1	2	0	2	2
isogroup131853	6	1	5	8	2	1	0	0	5	2
isogroup310819	6	1	7	4	1	3	3	2	2	1
isogroup313129	6	1	8	3	0	1	0	0	5	6
isogroup296043	6	1	8	3	2	1	2	0	6	1
isogroup324805	6	1	8	6	0	0	1	0	4	4
isogroup332368	6	2	4	3	0	1	1	0	6	7
isogroup312372	6	2	5	12	0	0	0	1	2	2
isogroup8811	6	2	8	4	1	1	0	2	5	1
isogroup333991	6	2	9	0	1	2	1	3	3	3
isogroup400169	6	3	3	0	3	1	3	4	3	4
isogroup12313	7	0	2	10	0	3	3	1	4	0
isogroup319566	7	0	4	3	0	3	2	2	6	3
isogroup322545	7	0	4	6	0	3	0	2	6	2
isogroup167513	7	0	5	3	1	3	0	0	6	5
isogroup320258	7	0	5	8	1	2	0	0	6	1
isogroup347919	7	0	7	4	1	0	0	0	10	1
isogroup349505	7	0	10	5	2	0	0	0	3	3
isogroup332975	7	0	11	8	0	0	1	0	2	1
isogroup155672	7	1	2	6	3	2	1	1	5	2
isogroup453959	7	1	3	0	1	3	2	1	9	3
isogroup306651	7	1	3	5	4	1	1	1	6	1
isogroup325143	7	1	4	10	0	1	2	0	4	1
isogroup124708	7	1	6	5	1	1	2	1	2	4
isogroup351010	7	1	8	2	1	0	0	3	6	2
isogroup322131	7	1	8	5	1	3	1	1	3	0
isogroup317870	7	1	9	5	2	0	0	1	4	1
isogroup126004	7	2	3	4	0	1	4	0	6	3
isogroup318358	7	3	8	3	0	2	2	0	3	2
isogroup2044	7	4	2	9	0	0	1	1	5	1
isogroup337787	8	0	4	4	2	6	1	0	2	3
isogroup324876	8	0	6	6	2	2	0	1	3	2
isogroup27302	8	1	4	5	2	2	3	0	2	3
isogroup328451	8	2	4	6	0	0	1	0	4	5
isogroup302255	9	0	2	4	1	3	4	1	4	2
isogroup6784	9	0	4	4	2	1	0	0	6	4
isogroup357393	9	0	7	2	2	1	2	1	4	2
isogroup326544	9	0	10	2	0	1	1	0	3	4
isogroup318217	9	1	1	3	1	3	0	0	10	2
isogroup2773	9	1	10	2	0	0	1	0	4	3
isogroup339755	9	2	5	3	3	1	0	1	5	1
isogroup352017	10	0	3	1	1	0	3	0	8	4
isogroup329901	10	0	3	5	2	0	0	0	9	1
isogroup322494	10	0	4	3	1	0	2	0	4	6
isogroup70355	10	0	4	5	0	3	0	1	3	4
isogroup2030	10	0	8	1	1	2	0	0	3	5
isogroup330242	10	0	10	2	1	0	1	0	4	2
isogroup335486	10	0	11	1	0	3	0	0	3	2
isogroup120880	10	1	2	4	1	0	0	1	5	6
isogroup328462	10	1	3	3	0	1	1	0	6	5
isogroup106444	10	1	3	4	0	1	1	1	5	4
isogroup200927	10	1	3	4	4	1	0	1	3	3
isogroup321213	10	1	4	4	1	1	1	0	3	5
isogroup361941	10	1	7	6	0	1	2	0	1	2
isogroup327203	10	1	8	5	1	1	0	0	2	2
isogroup311199	10	2	1	6	0	1	5	0	2	3
isogroup332541	11	0	4	4	0	4	0	0	6	1
isogroup343748	11	0	4	7	1	1	1	1	4	0
isogroup334103	11	0	5	4	0	1	0	2	3	4
isogroup331941	11	0	5	4	0	5	1	0	4	0
isogroup332097	11	0	7	2	1	2	0	0	5	2
isogroup329898	11	0	10	3	1	3	0	1	0	1
isogroup360224	11	1	2	7	3	1	0	0	2	3
isogroup335139	11	1	4	8	0	1	0	1	3	1
isogroup114680	11	2	2	2	1	2	0	5	2	3
isogroup317022	12	0	8	2	1	3	1	0	2	1
isogroup313384	12	0	9	3	0	2	0	0	2	2
isogroup321529	12	3	4	3	1	2	1	0	3	1
isogroup337479	15	0	3	4	1	2	2	0	3	0
isogroup344586	15	0	5	3	2	1	0	0	4	0
isogroup341166	16	0	1	4	0	3	1	1	2	2
isogroup345688	17	0	2	4	1	2	0	0	4	0
isogroup259391	1	0	2	10	6	6	6	0	0	0
isogroup325035	1	1	8	5	2	1	1	2	7	3
isogroup305493	1	2	4	11	2	2	1	0	5	3
isogroup312844	2	0	4	7	0	2	2	0	9	5
isogroup171304	2	0	4	11	0	2	5	1	4	2
isogroup317967	2	1	6	4	1	5	0	0	6	6
isogroup374236	2	1	13	0	2	2	0	0	6	5
isogroup332487	2	2	2	9	2	0	3	0	7	4
isogroup317619	2	2	10	8	0	0	2	0	5	2
isogroup253081	2	4	2	5	5	0	1	1	4	7
isogroup315491	2	6	2	6	1	2	2	1	3	6
isogroup312953	3	0	6	8	2	1	4	3	2	2
isogroup329840	3	1	3	11	0	0	2	1	4	6
isogroup326412	3	1	6	11	2	0	1	0	5	2
isogroup91111	3	1	7	8	0	2	2	1	6	1
isogroup402493	3	4	3	1	4	4	2	1	6	3
isogroup364134	3	4	3	4	3	3	1	6	1	3
isogroup73445	4	0	2	7	2	1	2	2	8	3
isogroup335983	4	0	3	8	1	3	3	3	2	4
isogroup76625	4	0	5	11	1	1	2	0	5	2
isogroup328398	4	0	9	6	1	2	0	1	8	0
isogroup196502	4	1	4	10	1	1	2	2	1	5
isogroup120627	4	1	5	3	0	3	1	2	7	5
isogroup343613	4	1	8	5	2	0	0	0	7	4
isogroup146111	4	2	3	11	0	2	2	1	5	1
isogroup326718	4	2	6	10	1	2	0	0	5	1
isogroup124731	4	2	7	8	1	3	0	0	0	6
isogroup308801	4	2	9	4	1	2	5	1	1	2
isogroup32548	4	3	2	8	2	3	1	2	3	3
isogroup171869	4	4	0	2	3	7	0	3	4	4
isogroup4640	4	5	0	3	8	1	0	2	4	4
isogroup230195	4	6	2	2	2	2	1	3	4	5
isogroup335646	5	0	5	3	0	2	1	1	9	5
isogroup340638	5	0	5	4	0	3	2	2	9	1
isogroup333286	5	0	6	4	0	3	0	2	5	6
isogroup319805	5	0	6	11	0	3	1	0	4	1
isogroup74637	5	0	8	7	2	1	0	2	4	2
isogroup72202	5	1	1	10	2	1	3	0	7	1
isogroup186582	5	1	2	9	0	5	3	0	4	2
isogroup155429	5	1	2	10	1	0	0	0	10	2
isogroup23711	5	1	4	3	0	3	3	2	6	4
isogroup233391	5	1	5	5	1	2	0	2	5	5
isogroup40533	5	1	5	8	1	2	2	0	3	4
isogroup32959	5	1	8	10	0	1	0	0	2	4
isogroup69401	5	1	9	5	3	0	1	1	4	2
isogroup29590	5	1	9	8	0	2	0	0	3	3
isogroup321262	5	1	10	7	0	4	0	1	3	0
isogroup306324	5	2	5	6	2	2	1	2	5	1
isogroup314293	5	2	5	7	0	0	2	1	4	5
isogroup329449	5	2	6	6	0	2	0	0	8	2
isogroup133873	5	2	6	6	1	3	0	0	3	5
isogroup340472	5	2	7	5	1	2	1	0	7	1
isogroup67268	5	3	4	7	3	0	1	2	5	1
isogroup221927	5	6	0	5	1	3	0	4	1	6
isogroup60961	6	0	2	8	2	1	2	1	6	3
isogroup303009	6	0	3	9	1	1	3	0	5	3
isogroup339028	6	0	6	4	1	4	0	2	6	2
isogroup324777	6	0	8	2	1	3	1	1	5	4
isogroup318322	6	0	8	6	0	3	0	1	4	3
isogroup323758	6	1	4	6	2	3	0	0	5	4
isogroup308942	6	1	5	7	0	2	4	0	4	2
isogroup318404	6	1	7	6	0	0	3	0	4	4
isogroup35781	6	1	7	8	0	3	0	2	3	1
isogroup308651	6	1	8	8	1	1	1	0	4	1
isogroup309095	6	2	4	5	2	0	2	1	4	5
isogroup324936	6	2	7	5	1	4	0	0	6	0
isogroup339231	6	3	0	0	0	15	7	0	0	0
isogroup389475	6	3	2	3	4	2	4	2	2	3
isogroup45199	7	0	5	4	2	2	0	2	5	4
isogroup21578	7	0	6	3	1	1	3	1	5	4
isogroup179809	7	0	7	1	2	3	0	1	5	5
isogroup327077	7	0	9	6	0	1	1	0	5	2
isogroup328971	7	1	3	7	4	0	1	0	5	3
isogroup318376	7	1	3	11	0	1	0	0	3	5
isogroup315987	7	1	4	9	0	1	0	1	5	3
isogroup331696	7	1	5	5	1	3	1	0	4	4
isogroup318458	7	1	7	5	1	1	1	2	2	4
isogroup96990	7	2	5	9	1	1	1	0	4	1
isogroup322393	7	2	6	4	0	0	5	1	5	1
isogroup317207	7	3	2	6	0	2	2	1	8	0
isogroup78049	8	0	5	6	1	4	1	1	4	1
isogroup334863	8	0	5	7	0	1	1	0	5	4
isogroup110787	8	0	6	6	0	4	0	0	4	3
isogroup320359	8	1	3	7	2	3	1	2	0	4
isogroup63383	8	1	4	3	1	3	0	0	9	2
isogroup348274	8	1	4	6	1	1	1	1	4	4
isogroup325677	8	1	5	3	0	1	2	1	9	1
isogroup306181	8	1	5	4	0	1	2	0	7	3
isogroup323250	8	1	5	5	1	1	2	0	7	1
isogroup72700	8	1	5	6	1	2	0	0	6	2
isogroup315165	8	1	5	9	1	1	1	0	3	2
isogroup339325	8	1	7	3	4	2	0	0	4	2
isogroup318422	8	1	7	5	5	2	0	0	3	0
isogroup213920	8	2	3	1	1	5	0	3	5	3
isogroup79033	8	2	3	7	2	0	0	1	5	3
isogroup83157	8	2	4	4	3	2	0	1	3	4
isogroup187865	8	2	7	7	0	1	1	0	2	3
isogroup28971	8	3	6	3	1	1	2	0	5	2
isogroup204961	8	4	4	0	0	8	2	3	1	1
isogroup215455	8	5	2	1	1	5	0	3	4	2
isogroup72035	8	5	2	6	1	1	2	0	3	3
isogroup202325	9	0	3	6	2	0	2	1	4	4
isogroup337612	9	0	5	3	2	1	1	0	7	3
isogroup318021	9	0	5	6	1	0	0	1	5	4
isogroup331807	9	1	1	5	2	0	3	1	5	4
isogroup327406	9	1	4	3	1	1	0	0	10	2
isogroup315128	9	1	4	4	1	2	0	2	4	4
isogroup313693	9	1	4	6	0	0	1	1	6	3
isogroup322663	9	2	4	2	0	2	1	1	6	4
isogroup304243	9	2	4	8	2	1	0	0	0	5
isogroup331841	9	2	6	6	0	1	1	0	3	3
isogroup349271	9	2	10	3	0	2	0	0	4	1
isogroup344465	9	2	10	3	1	2	0	0	3	1
isogroup360456	9	4	6	4	2	4	0	0	2	0
isogroup315500	10	0	5	5	0	0	0	1	6	4
isogroup340687	10	0	7	6	0	3	0	1	2	2
isogroup320988	10	0	11	1	1	1	0	0	5	2
isogroup324681	10	2	4	2	0	4	1	0	4	4
isogroup322791	10	2	4	5	1	0	1	0	7	1
isogroup342532	11	0	8	3	2	1	0	0	3	3
isogroup381577	11	1	5	6	0	1	0	0	3	4
isogroup20160	11	1	8	1	3	4	0	1	1	1
isogroup321344	11	3	3	6	0	1	1	0	4	2
isogroup343350	12	0	7	4	2	1	1	2	1	1
isogroup352493	12	0	9	3	1	1	0	0	4	1
isogroup226445	12	1	6	2	0	1	0	1	6	2
isogroup346113	15	1	7	2	0	2	0	0	4	0
isogroup20150	0	2	2	7	5	2	8	2	1	3
isogroup141100	1	0	0	21	2	1	3	2	2	0
isogroup72615	1	1	4	11	2	2	3	4	0	4
isogroup329451	2	0	5	11	0	2	2	1	4	5
isogroup305408	2	1	9	8	0	1	3	2	3	3
isogroup102658	2	3	2	5	2	2	5	3	4	4
isogroup49318	3	0	8	4	0	2	2	1	4	8
isogroup208493	3	3	4	10	0	1	3	1	5	2
isogroup201242	3	3	5	8	1	3	0	1	5	3
isogroup187639	3	6	4	0	6	0	3	2	6	2
isogroup101299	4	0	1	11	2	3	4	0	4	3
isogroup323908	4	0	4	12	1	0	3	0	5	3
isogroup318573	4	0	6	13	1	1	2	0	4	1
isogroup321237	4	0	10	7	0	1	0	2	4	4
isogroup77180	4	1	4	8	0	1	2	0	7	5
isogroup322854	4	1	5	6	3	1	1	1	5	5
isogroup72572	4	1	6	10	1	0	2	0	4	4
isogroup361686	4	2	2	5	3	5	1	0	7	3
isogroup308981	4	2	3	6	0	3	4	1	5	4
isogroup207595	4	3	0	8	2	1	3	1	7	3
isogroup198496	4	3	2	1	2	5	2	2	6	5
isogroup327465	4	3	3	7	4	1	3	0	6	1
isogroup311190	4	3	6	3	2	0	5	1	5	3
isogroup358641	5	0	8	3	2	4	0	0	3	7
isogroup309962	5	1	4	9	1	0	2	1	5	4
isogroup4870	5	1	4	9	1	1	3	1	5	2
isogroup315249	5	1	5	8	0	2	3	0	3	5
isogroup308396	5	1	7	5	1	2	3	1	2	5
isogroup347469	5	1	7	6	1	3	0	0	5	4
isogroup308697	5	1	8	4	3	5	0	0	3	3
isogroup327695	5	1	9	3	1	3	1	1	4	4
isogroup96062	5	2	8	4	0	1	6	1	4	1
isogroup304547	5	3	2	9	0	1	4	1	4	3
isogroup326867	6	0	3	7	1	2	2	0	2	9
isogroup318353	6	0	4	6	0	2	2	0	9	3
isogroup359531	6	0	6	11	1	3	2	1	2	0
isogroup328472	6	1	4	8	0	1	1	0	6	5
isogroup82219	6	1	4	8	2	0	1	1	3	6
isogroup311840	6	1	5	4	2	2	2	0	6	4
isogroup311894	6	1	5	7	1	1	3	1	5	2
isogroup304929	6	1	5	7	2	0	1	0	9	1
isogroup334616	6	1	6	9	0	2	2	0	4	2
isogroup323724	6	1	9	8	0	2	2	0	2	2
isogroup75512	6	2	5	6	0	1	1	0	7	4
isogroup72329	6	2	5	6	2	1	0	2	3	5
isogroup86405	6	2	8	4	1	1	4	0	4	2
isogroup562118	6	3	6	4	1	5	1	1	3	2
isogroup120231	6	4	3	5	1	3	0	1	4	5
isogroup313647	7	0	2	6	2	3	2	0	4	6
isogroup329971	7	0	4	3	0	3	3	1	8	3
isogroup16137	7	0	5	9	2	0	1	0	4	4
isogroup340855	7	0	6	8	1	1	2	0	5	2
isogroup322031	7	1	2	9	0	2	1	0	5	5
isogroup334148	7	1	4	7	1	1	1	0	5	5
isogroup220168	7	1	5	2	0	9	1	1	4	2
isogroup72177	7	1	5	4	1	2	1	1	6	4
isogroup327985	7	1	7	3	2	2	1	0	7	2
isogroup321636	7	1	9	3	0	2	2	1	4	3
isogroup311384	7	2	2	5	1	2	1	0	5	7
isogroup202331	7	3	4	1	2	3	0	4	7	1
isogroup324721	7	3	6	8	1	2	0	0	4	1
isogroup315239	7	5	6	3	1	2	1	0	5	2
isogroup323609	8	0	2	4	2	1	0	1	12	2
isogroup128550	8	0	3	2	0	4	2	0	10	3
isogroup153475	8	0	4	5	0	3	4	0	5	3
isogroup327588	8	0	6	5	3	4	0	0	4	2
isogroup336990	8	0	7	4	1	1	0	1	8	2
isogroup323715	8	0	8	2	1	1	0	1	10	1
isogroup336142	8	0	8	3	1	1	0	2	5	4
isogroup310743	8	0	8	4	1	0	0	1	5	5
isogroup313261	8	0	9	2	1	3	1	1	4	3
isogroup318430	8	0	10	5	1	0	0	0	3	5
isogroup9379	8	1	3	3	0	4	2	1	7	3
isogroup315616	8	1	6	3	1	1	0	0	10	2
isogroup151693	8	1	6	6	1	1	1	1	1	6
isogroup308134	8	1	7	6	0	0	2	1	4	3
isogroup104644	8	1	7	8	1	0	2	0	3	2
isogroup342611	8	1	8	5	0	0	1	0	7	2
isogroup7119	8	2	4	2	0	1	2	0	10	3
isogroup321837	8	2	6	6	1	2	2	1	2	2
isogroup226295	8	3	4	3	4	3	2	2	2	1
isogroup317829	9	0	3	12	1	2	2	0	3	0
isogroup318343	9	0	5	3	1	2	0	2	5	5
isogroup324089	9	0	5	5	0	1	2	1	6	3
isogroup99906	9	0	9	3	0	1	1	0	7	2
isogroup320996	9	1	3	5	0	3	0	1	7	3
isogroup153009	9	1	3	8	1	1	2	0	6	1
isogroup28097	9	1	5	6	0	3	4	0	4	0
isogroup341801	9	1	6	5	0	3	0	0	7	1
isogroup341111	9	1	8	1	1	5	1	1	2	3
isogroup22572	9	2	5	7	2	2	2	0	2	1
isogroup314709	9	2	6	4	2	2	0	1	6	0
isogroup320214	9	2	8	5	0	0	0	1	3	4
isogroup317402	9	3	1	9	1	1	1	1	4	2
isogroup325490	10	0	3	6	1	1	1	2	6	2
isogroup349736	10	0	7	5	0	2	0	0	2	6
isogroup371926	10	0	8	5	0	0	1	1	3	4
isogroup310532	10	1	3	6	1	3	0	0	5	3
isogroup322112	10	1	3	7	1	4	2	0	2	2
isogroup306712	10	1	3	8	0	2	0	1	5	2
isogroup350516	10	1	4	1	2	3	5	2	4	0
isogroup120454	10	1	6	5	1	1	2	0	2	4
isogroup320378	10	1	7	2	3	0	0	1	4	4
isogroup318181	10	1	8	3	4	2	1	0	2	1
isogroup123841	10	3	1	5	0	2	1	1	6	3
isogroup334530	11	0	4	2	1	1	0	1	8	4
isogroup351286	11	0	5	3	1	2	2	2	4	2
isogroup122694	11	0	6	5	0	0	0	1	8	1
isogroup331316	11	0	7	2	0	5	1	0	4	2
isogroup331481	11	1	3	7	1	1	2	1	5	0
isogroup38325	11	1	4	8	1	2	0	2	1	2
isogroup2247	11	1	5	7	0	1	1	0	3	3
isogroup318942	11	1	8	4	0	0	1	0	6	1
isogroup339950	11	4	2	4	2	0	1	0	6	2
isogroup312642	12	0	5	4	0	2	3	0	3	3
isogroup324795	12	0	6	6	0	1	0	1	6	0
isogroup327495	12	2	4	6	0	1	1	1	4	1
isogroup169973	12	3	4	2	2	1	2	1	2	3
isogroup331021	13	1	4	4	0	0	2	0	5	3
isogroup313462	13	1	4	7	0	1	0	0	1	5
isogroup334389	13	1	6	1	0	2	1	1	6	1
isogroup313458	13	1	6	3	2	0	1	1	4	1
isogroup326855	14	0	6	4	0	1	0	1	5	1
isogroup348828	14	0	6	5	0	3	0	0	1	3
isogroup7513	14	1	4	2	0	0	0	2	2	7
isogroup155113	16	0	0	3	0	2	0	0	6	5
isogroup307939	17	1	1	5	0	0	3	1	1	3
isogroup400046	22	1	4	0	2	0	1	0	2	0
isogroup357136	0	0	14	1	2	0	0	0	3	13
isogroup313216	2	0	9	15	0	0	2	0	4	1
isogroup6269	2	1	2	2	5	2	4	4	2	9
isogroup315390	3	0	2	9	1	2	4	0	7	5
isogroup161793	3	0	6	8	2	2	0	2	2	8
isogroup7866	3	0	13	3	0	1	3	0	5	5
isogroup300542	3	2	6	8	1	1	1	1	4	6
isogroup59179	3	2	8	9	0	2	0	1	6	2
isogroup218870	3	3	4	3	2	4	0	7	1	6
isogroup330829	3	3	9	7	1	2	3	0	2	3
isogroup144751	3	5	1	1	4	6	4	2	2	5
isogroup75732	4	0	4	10	0	2	1	1	9	2
isogroup315783	4	0	8	8	1	0	1	1	4	6
isogroup33301	4	1	4	3	2	4	6	1	2	6
isogroup318091	4	1	5	4	1	4	0	0	8	6
isogroup319448	4	1	5	9	1	1	1	1	7	3
isogroup323340	4	1	7	9	3	0	1	0	3	5
isogroup15217	4	1	8	4	0	0	4	0	5	7
isogroup378376	4	2	6	3	1	3	1	2	3	8
isogroup313920	4	2	6	5	0	0	3	1	4	8
isogroup109225	4	3	6	4	1	2	0	1	8	4
isogroup217996	4	4	5	2	3	5	2	4	1	3
isogroup106194	5	0	6	2	1	2	3	3	9	2
isogroup110650	5	0	6	9	1	1	1	1	7	2
isogroup3393	5	0	8	10	0	1	0	1	4	4
isogroup318478	5	0	9	8	1	2	0	0	5	3
isogroup109631	5	1	2	8	2	1	2	0	6	6
isogroup309621	5	1	3	11	1	1	3	1	3	4
isogroup316976	5	1	5	10	0	0	0	2	8	2
isogroup315098	5	1	7	5	4	1	4	0	6	0
isogroup70005	5	1	8	12	0	0	0	0	3	4
isogroup316137	5	1	11	4	1	4	2	0	4	1
isogroup318678	5	2	2	6	0	2	2	1	6	7
isogroup188385	5	2	4	2	2	3	1	6	4	4
isogroup236300	5	2	5	4	2	6	2	0	4	3
isogroup121019	5	3	5	5	1	2	1	3	4	4
isogroup217663	5	4	5	2	5	1	1	0	3	7
isogroup321109	6	0	3	9	0	0	1	3	8	3
isogroup71501	6	0	5	9	1	2	3	1	2	4
isogroup314880	6	0	5	11	1	1	0	0	5	4
isogroup313864	6	0	7	10	0	1	2	0	3	4
isogroup330692	6	0	7	10	1	3	0	0	4	2
isogroup328754	6	0	11	7	0	4	1	0	2	2
isogroup17543	6	1	4	8	3	2	0	1	7	1
isogroup302362	6	1	4	13	0	2	1	1	3	2
isogroup315590	6	1	4	13	2	0	2	0	4	1
isogroup312736	6	1	6	5	1	5	3	2	2	2
isogroup317824	6	1	7	5	2	1	1	1	6	3
isogroup323350	6	1	9	8	1	2	3	1	1	1
isogroup108989	6	2	4	6	1	1	1	2	4	6
isogroup229139	6	3	1	4	1	6	3	4	4	1
isogroup208816	6	5	5	3	0	3	2	3	2	4
isogroup350776	7	0	3	7	0	4	0	0	8	4
isogroup314742	7	0	3	8	1	3	5	2	2	2
isogroup343562	7	0	5	4	0	5	1	1	7	3
isogroup326059	7	0	5	4	2	1	3	1	7	3
isogroup325077	7	0	6	3	2	1	2	0	5	7
isogroup122721	7	0	6	4	1	3	7	0	4	1
isogroup77108	7	0	7	3	1	0	0	2	8	5
isogroup318631	7	0	7	6	3	3	2	0	3	2
isogroup317822	7	1	2	10	4	2	2	1	3	1
isogroup33092	7	1	4	8	2	2	1	2	3	3
isogroup99584	7	1	5	1	0	1	1	4	11	2
isogroup3136	7	1	5	6	1	2	0	0	5	6
isogroup204977	7	1	6	2	4	5	1	2	4	1
isogroup331149	7	1	6	6	0	0	1	0	9	3
isogroup337796	7	1	9	3	1	3	0	0	5	4
isogroup72724	7	2	4	8	1	0	3	0	6	2
isogroup326721	7	2	9	4	3	0	0	0	4	4
isogroup299041	7	3	7	5	3	1	2	0	5	0
isogroup18842	7	3	8	3	2	3	0	1	4	2
isogroup326254	7	5	4	5	2	1	0	0	6	3
isogroup110573	8	0	5	8	2	0	3	0	4	3
isogroup169637	8	0	6	5	1	3	2	0	7	1
isogroup326398	8	0	7	2	2	3	0	1	7	3
isogroup26921	8	0	7	4	1	2	1	1	6	3
isogroup320650	8	0	8	5	1	1	1	3	3	3
isogroup326991	8	0	11	6	0	1	0	0	5	2
isogroup325536	8	0	11	6	2	0	0	0	4	2
isogroup330401	8	1	3	3	2	4	3	2	1	6
isogroup220701	8	1	4	2	1	6	0	1	5	5
isogroup314753	8	1	4	6	1	1	4	2	5	1
isogroup317257	8	1	4	8	1	1	1	1	7	1
isogroup58582	8	1	6	7	1	2	1	1	4	2
isogroup220725	8	1	6	9	0	1	0	0	4	4
isogroup60894	8	1	7	10	0	0	1	2	2	2
isogroup338385	8	1	8	4	0	3	1	0	4	4
isogroup312622	8	1	9	6	1	2	2	1	2	1
isogroup322555	8	1	9	7	0	0	1	0	5	2
isogroup162850	8	2	2	9	2	1	0	2	5	2
isogroup307980	8	2	4	8	0	1	1	0	5	4
isogroup318448	8	2	6	7	1	3	2	0	0	4
isogroup201949	8	2	6	7	2	0	3	0	3	2
isogroup307278	8	2	7	6	0	1	5	0	3	1
isogroup10007	8	2	8	1	2	3	0	3	4	2
isogroup313237	8	3	7	4	0	2	0	1	6	2
isogroup36558	9	0	3	9	3	0	2	0	2	5
isogroup324702	9	0	4	8	1	0	1	1	5	4
isogroup41573	9	0	8	3	0	3	1	0	8	1
isogroup338164	9	0	10	4	0	3	1	0	3	3
isogroup314822	9	1	5	4	3	0	0	0	6	5
isogroup74356	9	1	5	7	1	3	2	0	4	1
isogroup346252	9	1	5	9	0	0	0	0	5	4
isogroup339602	9	1	7	8	0	3	0	0	2	3
isogroup70822	9	1	8	3	2	3	0	1	4	2
isogroup326135	9	2	0	8	2	2	1	0	4	5
isogroup196136	9	2	5	9	2	0	1	0	5	0
isogroup131550	9	3	0	3	4	3	2	2	4	3
isogroup71674	10	0	4	9	1	1	1	1	5	1
isogroup317989	10	0	5	7	1	0	1	1	6	2
isogroup194830	10	0	7	5	2	1	0	0	5	3
isogroup310978	10	0	10	8	1	1	0	0	2	1
isogroup142008	10	1	2	3	0	1	1	0	14	1
isogroup319384	10	1	3	1	1	2	4	1	6	4
isogroup313600	10	1	4	10	1	1	2	0	3	1
isogroup331113	10	1	5	7	1	2	1	0	6	0
isogroup221839	10	2	0	1	3	7	4	2	3	1
isogroup70167	10	2	3	10	1	0	1	0	4	2
isogroup321306	10	2	3	11	1	0	0	1	5	0
isogroup319202	10	2	5	3	0	1	4	0	5	3
isogroup327697	10	2	5	4	0	1	1	2	5	3
isogroup320147	10	2	8	2	1	0	1	0	4	5
isogroup315244	11	0	2	10	1	0	0	0	3	6
isogroup110797	11	0	3	8	0	0	4	1	5	1
isogroup45677	11	0	4	10	0	0	0	0	6	2
isogroup335092	11	0	5	5	1	1	2	1	2	5
isogroup349536	11	0	6	3	0	2	0	0	7	4
isogroup319357	11	1	8	2	0	1	0	0	7	3
isogroup78882	11	2	6	4	0	0	1	1	4	4
isogroup224969	12	0	4	2	0	2	0	0	10	3
isogroup328268	12	0	5	5	1	1	0	1	5	3
isogroup191368	12	1	9	4	0	2	0	1	2	2
isogroup331607	12	2	3	7	0	2	0	0	6	1
isogroup335091	12	2	5	1	0	5	0	3	4	1
isogroup336991	12	3	5	3	0	0	1	3	4	2
isogroup331477	13	0	4	5	0	0	1	1	4	5
isogroup151745	13	0	7	0	0	0	1	1	8	3
isogroup342785	13	1	3	6	0	2	0	2	4	2
isogroup333697	13	1	4	6	1	0	4	1	2	1
isogroup318409	15	0	2	6	2	2	0	1	3	2
isogroup571	15	0	8	2	1	4	1	1	1	0
isogroup88209	15	2	3	10	0	0	0	0	1	2
isogroup107592	16	0	3	5	2	1	1	0	2	3
isogroup323174	17	0	1	4	0	2	1	0	4	4
isogroup339883	20	0	2	3	0	3	0	0	3	2
isogroup229786	1	3	3	2	5	5	0	3	5	7
isogroup332766	1	6	1	8	2	2	2	6	0	6
isogroup320117	3	0	10	11	0	2	0	1	5	2
isogroup315719	3	1	10	6	4	3	1	0	3	3
isogroup142305	3	6	7	5	5	4	0	1	1	2
isogroup58395	4	0	3	9	1	4	5	2	3	3
isogroup91179	4	0	4	13	1	1	4	0	6	1
isogroup72824	4	1	4	10	1	3	3	0	6	2
isogroup208754	4	2	4	3	3	2	3	4	4	5
isogroup90445	4	2	5	14	1	1	3	1	3	0
isogroup325412	5	0	5	7	1	4	2	0	7	3
isogroup7225	5	0	5	15	1	1	0	1	2	4
isogroup319951	5	0	10	9	0	1	3	0	5	1
isogroup240679	5	1	2	4	4	4	0	6	3	5
isogroup320665	5	1	11	7	0	1	0	1	4	4
isogroup32915	6	0	1	2	0	7	0	0	15	3
isogroup337950	6	0	8	7	2	4	1	0	4	2
isogroup238677	6	0	11	6	2	0	0	0	4	5
isogroup175589	6	1	3	4	0	1	3	0	6	10
isogroup321082	6	1	3	9	0	3	7	1	1	3
isogroup322627	6	1	6	8	1	2	4	0	3	3
isogroup76268	6	1	8	7	2	2	1	0	4	3
isogroup318057	6	1	11	3	1	3	1	0	5	3
isogroup320176	6	1	13	5	1	2	2	1	1	2
isogroup169177	6	2	1	4	2	5	0	6	6	2
isogroup156549	6	2	4	10	2	0	2	2	2	4
isogroup306143	6	2	5	7	2	3	1	0	7	1
isogroup141425	6	3	1	1	2	3	2	3	4	9
isogroup252086	6	3	4	1	2	3	1	5	2	7
isogroup14742	6	3	10	1	0	2	1	2	4	5
isogroup92354	6	4	4	8	1	1	1	0	2	7
isogroup307122	6	4	5	6	0	4	2	1	4	2
isogroup155884	7	0	1	7	2	5	1	0	8	3
isogroup320081	7	0	2	6	1	1	3	2	6	6
isogroup134908	7	0	5	4	0	1	2	0	11	4
isogroup60413	7	0	6	9	0	2	1	1	6	2
isogroup77067	7	0	7	3	1	1	2	0	9	4
isogroup320198	7	0	7	3	1	3	1	4	4	4
isogroup319056	7	0	7	8	2	3	1	1	3	2
isogroup309784	7	1	9	5	0	1	2	2	6	1
isogroup543139	7	2	3	1	6	5	0	3	3	4
isogroup157699	7	2	8	3	0	0	2	1	9	2
isogroup309390	7	3	7	4	2	2	0	0	7	2
isogroup319283	7	3	8	3	3	3	2	0	5	0
isogroup310234	8	0	3	5	0	0	2	1	8	7
isogroup4914	8	0	4	6	1	3	1	1	7	3
isogroup320956	8	0	8	5	1	2	1	0	5	4
isogroup86516	8	0	8	7	0	4	1	0	5	1
isogroup318107	8	0	10	2	1	4	1	0	6	2
isogroup419658	8	1	5	2	1	5	0	3	4	5
isogroup322702	8	1	5	3	2	4	0	1	7	3
isogroup179162	8	1	7	5	1	2	2	1	3	4
isogroup361559	8	2	3	3	4	6	0	2	2	4
isogroup319333	8	2	6	10	4	0	0	1	1	2
isogroup124054	8	3	4	8	3	2	2	0	1	3
isogroup8307	8	3	6	6	0	2	1	2	2	4
isogroup339714	9	0	1	4	0	2	1	0	11	6
isogroup107685	9	0	3	7	1	2	5	0	3	4
isogroup318625	9	0	4	5	0	1	3	2	6	4
isogroup95034	9	0	6	9	0	2	0	1	6	1
isogroup328216	9	0	7	5	0	3	1	1	5	3
isogroup3772	9	0	12	5	0	3	0	0	3	2
isogroup71159	9	1	5	9	1	2	1	0	3	3
isogroup94687	9	1	7	9	1	2	0	0	2	3
isogroup122504	9	1	8	4	0	3	0	1	7	1
isogroup307726	9	1	8	7	2	1	0	0	4	2
isogroup76973	9	1	9	3	3	1	1	0	2	5
isogroup207949	10	0	2	4	1	4	1	0	10	2
isogroup326699	10	0	4	7	1	3	0	1	6	2
isogroup319662	10	0	4	8	2	0	3	0	2	5
isogroup132977	10	1	2	1	5	5	2	3	5	0
isogroup99191	10	1	2	8	3	3	2	0	2	3
isogroup317074	10	1	5	5	0	2	0	2	6	3
isogroup325574	10	1	7	2	2	2	0	1	5	4
isogroup307777	10	2	3	11	0	2	1	0	1	4
isogroup358886	10	2	6	3	2	2	0	0	5	4
isogroup66832	10	2	6	4	0	1	2	1	6	2
isogroup328323	10	2	6	5	1	2	0	1	5	2
isogroup303286	10	4	4	7	2	1	0	0	4	2
isogroup319161	11	0	5	3	0	2	1	1	4	7
isogroup320993	11	0	9	2	1	2	1	0	5	3
isogroup325940	11	0	12	3	0	0	0	0	6	2
isogroup347142	11	1	5	1	1	3	0	1	6	5
isogroup363441	11	1	6	3	1	4	0	0	5	3
isogroup327828	11	1	6	4	0	2	2	0	4	4
isogroup323783	11	1	8	2	1	2	2	0	5	2
isogroup229207	11	2	4	2	0	7	0	2	5	1
isogroup330173	11	2	4	6	0	1	2	1	6	1
isogroup219135	11	3	4	7	1	0	4	1	2	1
isogroup322844	12	0	3	6	2	1	2	0	4	4
isogroup228401	12	0	4	1	0	1	1	1	7	7
isogroup349858	12	0	5	6	0	4	1	0	5	1
isogroup327083	12	0	7	5	0	2	0	0	7	1
isogroup59297	12	0	9	4	0	0	2	2	4	1
isogroup347345	12	1	6	2	1	5	0	0	5	2
isogroup5769	12	2	2	3	2	2	0	1	4	6
isogroup325601	12	2	3	7	3	0	2	0	2	3
isogroup305255	13	1	4	6	0	1	3	0	5	1
isogroup332962	13	1	5	5	0	0	0	1	5	4
isogroup319485	13	2	5	3	1	2	0	0	4	4
isogroup321218	13	2	5	4	1	1	2	0	5	1
isogroup146627	14	0	6	1	0	9	1	0	0	3
isogroup354391	14	0	8	4	1	3	0	0	1	3
isogroup329779	14	2	4	2	1	2	0	0	5	4
isogroup327114	14	2	7	1	2	1	0	2	3	2
isogroup316426	15	1	6	4	1	0	0	1	4	2
isogroup327580	16	0	5	2	2	2	0	1	4	2
isogroup328618	19	1	8	4	0	0	0	1	0	1
isogroup219309	2	0	3	9	2	4	6	3	4	2
isogroup161076	2	1	7	4	1	6	1	6	3	4
isogroup90150	3	0	9	7	2	1	6	0	4	3
isogroup325297	3	1	9	9	0	4	1	1	6	1
isogroup56762	4	0	4	9	2	2	1	2	8	3
isogroup318946	4	0	5	11	1	2	2	0	8	2
isogroup315310	4	0	5	13	0	1	3	0	5	4
isogroup329685	4	0	7	14	2	1	1	1	1	4
isogroup309234	4	0	9	8	2	3	0	1	5	3
isogroup205413	4	0	10	5	1	1	1	2	4	7
isogroup124177	4	1	5	11	1	2	4	1	3	3
isogroup326753	4	1	5	17	1	2	0	1	4	0
isogroup315378	4	1	7	6	0	4	3	1	5	4
isogroup69376	4	2	4	8	4	0	0	1	6	6
isogroup317356	4	2	5	9	0	3	3	0	4	5
isogroup316266	4	2	7	12	1	2	2	0	3	2
isogroup226110	4	3	0	3	4	4	1	5	8	3
isogroup316036	4	3	8	4	2	2	0	2	7	3
isogroup332481	5	0	7	5	0	6	0	1	7	4
isogroup154100	5	2	2	3	1	1	1	8	4	8
isogroup327111	5	2	6	4	1	4	2	1	5	5
isogroup66391	5	2	8	6	4	0	2	2	4	2
isogroup315166	6	0	6	13	0	1	1	0	6	2
isogroup317670	6	0	8	7	2	3	0	0	6	3
isogroup318439	6	0	12	9	1	2	0	0	5	0
isogroup316378	6	1	1	13	1	1	1	0	7	4
isogroup224064	6	1	8	7	0	1	2	1	6	3
isogroup66916	6	1	9	9	1	1	0	3	3	2
isogroup296079	6	2	5	7	1	1	4	0	6	3
isogroup243484	6	3	3	2	1	7	1	2	8	2
isogroup38388	6	3	3	7	4	1	1	2	4	4
isogroup324210	6	3	5	7	2	3	5	0	1	3
isogroup313002	6	3	9	6	1	2	3	0	1	4
isogroup346755	6	3	10	7	0	0	0	0	5	4
isogroup29374	7	1	8	4	0	6	0	0	5	4
isogroup94141	7	2	1	8	2	2	3	2	5	3
isogroup310387	7	2	3	10	0	0	1	0	10	2
isogroup305496	7	2	5	7	0	1	0	3	7	3
isogroup308989	7	2	7	7	2	0	1	0	5	4
isogroup186266	7	3	6	2	1	4	1	2	6	3
isogroup314594	8	0	6	10	2	0	3	0	4	2
isogroup23328	8	0	7	9	2	0	1	1	3	4
isogroup339933	8	1	10	4	1	0	0	2	7	2
isogroup334862	8	1	11	4	1	4	0	0	3	3
isogroup99396	8	2	1	6	3	1	2	2	5	5
isogroup240609	8	2	4	2	3	5	1	5	1	4
isogroup316714	8	2	6	6	2	1	0	1	6	3
isogroup59518	8	3	6	3	2	1	4	0	5	3
isogroup202080	8	5	3	4	1	6	1	1	3	3
isogroup5536	8	5	3	8	1	0	3	1	3	3
isogroup310849	9	0	4	4	2	4	2	1	5	4
isogroup309785	9	0	5	10	1	2	1	1	5	1
isogroup4204	9	0	6	11	1	1	0	0	2	5
isogroup355403	9	1	3	5	2	1	1	2	4	7
isogroup319336	9	1	6	12	0	0	1	0	2	4
isogroup313142	9	1	9	6	1	0	2	0	2	5
isogroup319184	9	1	10	3	0	2	3	0	4	3
isogroup12824	9	1	10	4	0	3	1	0	6	1
isogroup319052	9	2	3	6	0	4	2	0	3	6
isogroup181080	9	2	4	3	2	2	2	3	6	2
isogroup314946	9	2	4	8	0	1	6	0	3	2
isogroup89009	9	2	6	8	0	1	2	1	1	5
isogroup326754	9	2	9	4	1	2	0	0	4	4
isogroup329146	9	3	2	6	1	0	0	3	7	4
isogroup316430	10	0	2	10	0	1	3	0	5	4
isogroup332192	10	0	4	3	2	4	1	0	4	7
isogroup189674	10	0	5	5	0	1	4	0	6	4
isogroup76785	10	0	5	7	1	3	0	1	4	4
isogroup9233	10	0	7	8	1	0	0	1	5	3
isogroup342359	10	0	8	4	1	2	0	1	3	6
isogroup320222	10	0	8	5	1	1	1	0	6	3
isogroup316222	10	1	3	3	1	1	0	2	11	3
isogroup311056	10	1	4	2	0	1	2	1	9	5
isogroup305239	10	1	5	4	2	1	3	0	4	5
isogroup92738	10	1	7	3	0	4	1	0	6	3
isogroup351275	10	1	10	4	2	0	0	0	3	5
isogroup321285	10	2	6	5	2	1	0	0	6	3
isogroup322417	11	0	3	9	1	2	1	1	4	3
isogroup322121	11	0	9	5	1	0	2	0	3	4
isogroup365121	11	1	3	3	2	4	0	0	8	3
isogroup328172	11	1	3	5	0	0	2	2	8	3
isogroup159303	11	1	5	0	1	14	0	0	2	1
isogroup314895	11	1	9	4	0	0	1	0	7	2
isogroup32924	11	2	3	5	1	3	3	2	4	1
isogroup309902	11	2	3	6	0	2	3	0	7	1
isogroup167981	11	2	8	2	2	1	0	3	5	1
isogroup324412	11	2	8	3	2	0	0	0	8	1
isogroup316034	11	3	4	5	2	2	0	1	5	2
isogroup331206	11	4	6	6	0	2	0	0	4	2
isogroup305218	12	0	6	6	3	2	0	1	4	1
isogroup315213	12	0	7	4	1	2	1	0	5	3
isogroup325300	12	0	8	4	1	3	0	0	5	2
isogroup322730	12	0	9	5	1	0	0	1	4	3
isogroup322080	12	2	1	3	0	2	3	1	7	4
isogroup314029	12	2	3	5	4	0	0	2	6	1
isogroup69937	13	0	7	1	1	4	2	1	3	3
isogroup319941	13	0	7	3	1	4	0	1	5	1
isogroup318586	13	0	8	2	2	0	1	0	7	2
isogroup332711	13	0	9	7	2	2	0	0	1	1
isogroup315471	13	5	5	3	0	2	1	2	2	2
isogroup324718	14	2	5	4	0	3	0	0	5	2
isogroup47175	15	0	4	6	0	3	0	0	6	1
isogroup318434	15	1	5	5	1	2	0	1	2	3
isogroup309133	16	1	4	1	1	2	3	0	4	3
isogroup337535	17	1	6	5	0	2	0	0	2	2
isogroup133612	3	0	9	11	1	1	2	2	4	3
isogroup316085	3	0	10	4	1	4	1	1	7	5
isogroup212230	3	2	0	8	5	7	3	3	2	3
isogroup187389	3	4	3	13	1	2	4	0	5	1
isogroup71947	3	4	9	9	0	1	2	1	5	2
isogroup310182	3	4	12	2	1	0	3	4	4	3
isogroup168755	4	0	6	8	4	4	2	3	3	2
isogroup162760	4	0	9	8	1	1	0	4	3	6
isogroup85287	4	1	5	9	2	3	1	1	5	5
isogroup9359	4	2	6	10	3	3	1	0	3	4
isogroup304604	4	2	7	7	0	2	1	1	9	3
isogroup317895	4	3	6	5	3	2	5	2	2	4
isogroup180216	4	4	4	1	4	7	0	4	4	4
isogroup61661	4	5	2	2	5	5	1	7	2	3
isogroup398845	4	6	4	3	3	2	1	4	5	4
isogroup318909	5	0	14	2	2	2	1	0	6	4
isogroup301844	5	1	3	5	2	1	0	0	13	6
isogroup15850	5	1	9	6	3	2	1	1	7	1
isogroup318455	5	2	4	14	2	0	2	0	4	3
isogroup70874	5	2	5	8	1	0	6	0	7	2
isogroup232280	6	0	5	7	3	2	0	2	2	9
isogroup332549	6	0	6	7	0	4	2	0	9	2
isogroup302523	6	0	7	12	0	1	1	2	4	3
isogroup42053	6	1	4	10	1	1	2	0	8	3
isogroup132322	6	1	4	10	2	1	3	0	6	3
isogroup315087	6	1	4	13	0	0	2	3	6	1
isogroup311670	6	1	5	13	2	2	0	0	4	3
isogroup309627	6	1	6	9	1	1	5	0	5	2
isogroup300776	6	1	7	7	3	1	5	1	3	2
isogroup317093	6	2	7	3	4	0	0	1	7	6
isogroup157098	6	2	8	4	0	2	4	1	7	2
isogroup330647	6	2	9	8	2	0	2	0	6	1
isogroup322317	6	3	2	11	0	2	2	0	7	3
isogroup83109	6	3	5	12	2	1	2	0	4	1
isogroup345076	7	0	7	7	2	1	2	1	8	1
isogroup102973	7	0	10	6	2	1	1	1	4	4
isogroup37199	7	1	3	9	0	0	1	1	9	5
isogroup323904	7	1	5	11	2	2	3	0	2	3
isogroup324000	7	2	8	6	1	4	0	1	6	1
isogroup57559	7	3	5	8	3	1	0	1	2	6
isogroup317326	7	3	6	6	0	3	1	1	6	3
isogroup70372	7	3	8	9	1	0	0	1	6	1
isogroup124511	8	0	4	11	1	1	1	2	4	4
isogroup308423	8	0	4	12	1	0	3	1	6	1
isogroup32486	8	0	7	7	0	2	0	1	8	3
isogroup352855	8	0	8	3	2	1	1	2	10	1
isogroup308719	8	1	3	8	1	1	3	0	7	4
isogroup90157	8	1	4	7	1	1	3	0	5	6
isogroup93909	8	1	5	6	2	0	5	0	5	4
isogroup329350	8	1	5	8	2	2	1	1	3	5
isogroup321257	8	1	7	6	1	2	1	2	5	3
isogroup205347	8	1	13	3	0	1	0	1	8	1
isogroup79388	8	2	6	5	1	3	0	0	7	4
isogroup313169	8	2	8	7	0	0	3	0	6	2
isogroup53017	8	2	11	6	0	1	1	0	4	3
isogroup47164	8	3	5	6	1	5	1	0	3	4
isogroup69775	8	3	7	6	0	0	1	1	6	4
isogroup69482	8	4	3	6	1	1	1	1	7	4
isogroup337401	9	0	13	0	3	3	1	0	6	1
isogroup312262	9	1	4	8	1	2	1	1	6	3
isogroup108581	9	1	6	6	0	2	1	3	4	4
isogroup189378	9	1	6	7	2	1	4	0	5	1
isogroup235161	9	1	8	10	0	1	1	2	3	1
isogroup327015	9	1	10	3	0	3	0	0	10	0
isogroup315283	9	2	3	11	1	2	1	0	5	2
isogroup32129	9	2	5	2	1	3	2	0	9	3
isogroup327641	9	2	8	6	1	2	0	1	6	1
isogroup4505	9	2	12	2	0	5	0	0	3	3
isogroup324720	9	4	7	4	0	2	0	0	7	3
isogroup319724	10	0	7	6	2	2	1	1	5	2
isogroup35010	10	0	9	12	1	0	0	1	3	0
isogroup329558	10	0	11	2	2	3	1	0	6	1
isogroup307753	10	1	4	8	0	2	0	1	5	5
isogroup397246	10	2	1	2	1	7	0	6	6	1
isogroup307498	10	2	6	6	2	0	0	0	3	7
isogroup329003	10	2	8	4	3	2	2	2	3	0
isogroup2212	10	2	9	5	1	0	2	1	2	4
isogroup313508	10	2	9	6	0	0	0	0	7	2
isogroup324354	10	2	12	5	0	2	1	0	4	0
isogroup118784	10	5	4	0	2	5	1	4	1	4
isogroup311743	11	0	2	5	3	4	0	1	5	5
isogroup317086	11	0	6	3	2	8	1	1	4	0
isogroup309835	11	0	6	9	0	0	3	2	5	0
isogroup328394	11	0	8	4	0	2	0	1	6	4
isogroup339969	11	0	10	4	1	2	0	0	5	3
isogroup308898	11	1	5	8	1	0	1	0	4	5
isogroup310733	11	1	6	5	2	2	2	1	4	2
isogroup324013	11	1	7	7	1	2	0	0	5	2
isogroup345540	11	1	7	8	0	1	0	2	3	3
isogroup321347	11	2	9	6	1	0	1	0	5	1
isogroup306863	12	1	3	7	2	1	2	1	4	3
isogroup323171	12	1	9	2	0	2	0	0	6	4
isogroup325293	12	2	4	4	1	3	0	2	4	4
isogroup320419	12	2	5	7	0	1	0	0	8	1
isogroup145275	13	0	4	4	2	4	4	1	4	0
isogroup358133	13	0	7	4	0	2	1	1	3	5
isogroup364757	13	2	10	5	0	2	0	1	3	0
isogroup335257	13	3	2	4	3	5	0	0	4	2
isogroup322838	14	0	2	7	0	3	3	0	5	2
isogroup324281	14	0	10	2	0	0	0	0	6	4
isogroup12275	14	1	7	2	1	1	1	2	5	2
isogroup329241	14	3	2	3	1	2	0	0	9	2
isogroup320932	15	1	4	2	1	5	1	1	3	3
isogroup336808	15	1	6	4	0	1	1	0	4	4
isogroup382520	16	0	1	0	0	8	0	0	10	1
isogroup322523	16	2	5	1	0	2	0	1	3	6
isogroup344347	17	0	4	5	1	1	0	0	6	2
isogroup324545	18	0	7	3	0	0	0	1	6	1
isogroup1966	19	1	1	4	0	2	0	1	6	2
isogroup333603	20	4	4	0	0	0	0	0	2	6
isogroup353199	31	2	0	0	0	0	1	0	0	2
isogroup309968	2	1	10	9	2	1	2	0	1	9
isogroup85468	3	1	10	13	1	1	4	1	2	1
isogroup195211	3	3	4	4	3	3	2	7	2	6
isogroup123653	4	1	5	6	3	5	1	5	3	4
isogroup304145	4	1	13	8	0	1	0	2	4	4
isogroup151265	4	2	7	14	0	0	2	0	5	3
isogroup306622	4	2	10	10	1	1	0	0	9	0
isogroup102958	4	3	3	3	2	6	5	1	6	4
isogroup330005	4	3	9	6	1	3	1	0	7	3
isogroup206866	4	5	1	8	2	4	0	5	5	3
isogroup334729	5	0	9	7	0	4	0	1	8	3
isogroup327256	5	0	11	6	1	3	1	0	7	3
isogroup306077	5	0	12	9	0	0	2	0	6	3
isogroup312695	5	1	7	4	0	3	7	2	6	2
isogroup319790	5	2	4	9	1	4	3	0	5	4
isogroup46285	5	2	5	4	3	2	2	4	5	5
isogroup305221	5	2	5	9	0	4	3	2	5	2
isogroup319847	5	2	5	10	1	1	3	1	5	4
isogroup194234	5	3	4	2	2	4	1	6	2	8
isogroup322503	5	3	6	5	0	4	2	1	6	5
isogroup181501	6	0	4	8	0	3	4	0	7	5
isogroup74976	6	0	10	7	0	3	0	2	4	5
isogroup66197	6	1	3	18	0	1	2	1	2	3
isogroup189932	6	1	5	4	3	3	1	2	3	9
isogroup299009	6	1	8	8	0	1	1	1	7	4
isogroup317378	6	1	11	9	0	0	3	0	4	3
isogroup332057	6	1	12	3	1	2	0	1	7	4
isogroup311356	6	1	12	5	1	1	1	2	6	2
isogroup178624	6	2	1	7	0	5	3	7	3	3
isogroup219693	6	2	9	4	1	1	4	1	6	3
isogroup69344	6	3	4	13	1	1	2	0	7	0
isogroup302924	6	3	7	6	1	3	0	0	8	3
isogroup310989	6	4	6	8	1	0	2	1	5	4
isogroup308040	7	0	7	4	1	3	3	0	9	3
isogroup72490	7	0	8	5	3	1	4	1	4	4
isogroup300133	7	0	8	7	1	1	4	1	6	2
isogroup224602	7	0	8	12	2	1	2	0	2	3
isogroup307771	7	1	3	14	1	3	0	2	3	3
isogroup72182	7	1	4	6	1	4	0	0	8	6
isogroup314255	7	1	4	10	1	5	2	1	3	3
isogroup321905	7	1	6	4	0	2	0	2	12	3
isogroup105335	7	1	6	8	1	0	0	3	6	5
isogroup316523	7	1	6	13	0	1	1	1	4	3
isogroup329300	7	2	7	7	2	3	2	1	5	1
isogroup314060	7	2	8	6	0	1	0	3	5	5
isogroup315197	7	2	9	5	2	5	0	1	4	2
isogroup123906	7	3	4	0	3	6	0	3	4	7
isogroup315266	7	3	5	6	3	2	1	1	6	3
isogroup310365	7	3	6	10	0	1	2	5	1	2
isogroup142916	7	3	7	4	3	4	1	2	4	2
isogroup347153	8	0	6	5	0	3	2	1	10	2
isogroup150897	8	0	6	12	0	2	0	0	3	6
isogroup195473	8	0	11	2	1	1	1	2	10	1
isogroup329870	8	1	6	10	1	2	2	0	4	3
isogroup28144	8	1	7	7	0	1	2	0	6	5
isogroup307246	8	1	7	10	1	1	0	0	8	1
isogroup310562	8	1	10	6	0	1	1	0	6	4
isogroup322256	8	1	14	2	1	4	0	1	4	2
isogroup122513	8	2	7	6	0	2	3	0	4	5
isogroup317847	8	2	10	7	0	1	0	0	6	3
isogroup211113	8	6	5	2	0	4	1	3	5	3
isogroup15932	9	0	3	12	2	1	0	1	5	4
isogroup123944	9	0	5	8	2	2	1	1	8	1
isogroup318188	9	0	7	5	0	0	2	0	5	9
isogroup337580	9	0	8	9	1	1	3	0	3	3
isogroup308807	9	1	4	6	1	0	1	1	12	2
isogroup305597	9	1	5	3	4	0	2	0	9	4
isogroup93836	9	1	5	8	2	0	4	0	6	2
isogroup6216	9	1	6	9	0	2	2	0	6	2
isogroup317717	9	1	6	10	0	1	1	0	6	3
isogroup325093	9	1	7	7	1	3	0	0	3	6
isogroup313271	9	1	8	7	1	3	0	0	5	3
isogroup225615	9	1	9	6	0	1	2	0	6	3
isogroup219040	9	2	5	2	6	2	1	4	0	6
isogroup319984	9	2	5	6	0	2	0	0	9	4
isogroup213198	9	2	6	3	3	5	2	1	4	2
isogroup89825	9	3	5	5	2	1	4	1	4	3
isogroup68652	10	0	5	1	1	5	2	1	7	5
isogroup69649	10	0	5	9	0	0	1	0	10	2
isogroup308487	10	0	9	5	2	2	2	1	2	4
isogroup101424	10	1	4	9	1	2	2	1	4	3
isogroup329876	10	1	5	6	2	4	0	0	7	2
isogroup309061	10	1	5	10	0	2	1	0	7	1
isogroup314069	10	1	7	6	3	2	0	1	4	3
isogroup308592	10	1	8	8	1	1	3	0	3	2
isogroup312906	10	1	10	8	0	0	3	0	4	1
isogroup61461	10	2	2	12	1	2	2	1	1	4
isogroup326962	10	2	7	8	0	2	0	1	5	2
isogroup7437	10	2	8	7	0	1	2	1	4	2
isogroup123268	10	2	10	4	0	1	3	2	5	0
isogroup329394	10	4	4	6	1	1	1	0	6	4
isogroup73719	11	0	4	7	1	3	0	0	9	2
isogroup322867	11	0	8	8	1	1	1	1	3	3
isogroup326281	11	0	9	5	0	3	1	1	5	2
isogroup298648	11	1	4	7	0	1	1	0	10	2
isogroup326261	11	1	6	4	0	3	3	0	7	2
isogroup312092	11	1	8	6	1	1	1	2	2	4
isogroup318362	11	1	8	7	0	2	1	0	7	0
isogroup325246	11	2	4	7	0	3	0	1	7	2
isogroup337878	11	3	2	1	5	3	4	4	3	1
isogroup320298	11	3	2	6	1	2	2	1	6	3
isogroup324506	11	3	3	4	2	1	2	0	5	6
isogroup346032	12	0	8	4	2	1	0	0	7	3
isogroup344104	12	0	9	5	1	0	0	2	6	2
isogroup368040	12	1	1	1	11	0	0	2	6	3
isogroup306671	12	2	2	10	1	1	0	1	4	4
isogroup308378	12	2	4	8	0	1	1	3	1	5
isogroup4830	12	2	8	5	0	4	1	1	3	1
isogroup315054	12	3	2	4	1	7	0	0	7	1
isogroup320565	13	0	6	5	0	3	0	1	4	5
isogroup327133	14	0	5	7	0	2	1	0	6	2
isogroup312530	14	0	6	2	0	3	1	0	8	3
isogroup148911	14	0	8	2	1	1	0	2	6	3
isogroup110647	14	2	1	6	1	3	2	0	6	2
isogroup6736	15	3	4	7	1	0	0	0	4	3
isogroup125591	2	0	13	6	1	0	0	0	2	14
isogroup323608	2	1	9	7	1	0	2	4	5	7
isogroup310129	3	0	7	13	0	0	3	0	3	9
isogroup333536	4	1	5	8	1	1	3	1	8	6
isogroup153264	4	6	3	0	3	7	2	9	3	1
isogroup322380	5	0	9	14	1	0	2	1	4	2
isogroup315751	5	1	4	10	2	1	3	0	5	7
isogroup76782	5	1	6	4	1	1	3	2	11	4
isogroup327655	5	2	5	8	3	3	2	1	3	6
isogroup99133	5	2	7	11	0	2	3	3	2	3
isogroup342443	6	0	3	8	0	4	2	0	10	5
isogroup309943	6	0	3	12	2	0	4	0	10	1
isogroup314094	6	0	6	8	1	5	2	0	8	2
isogroup319424	6	0	9	5	0	4	2	0	8	4
isogroup66340	6	1	2	13	1	1	1	1	6	6
isogroup307040	6	1	6	10	1	0	0	0	7	7
isogroup71612	6	1	7	3	3	1	4	2	8	3
isogroup149663	6	1	8	7	2	2	3	0	4	5
isogroup76930	6	1	8	8	3	0	1	3	3	5
isogroup165795	6	1	9	7	2	3	1	3	4	2
isogroup61556	6	2	4	4	1	6	0	1	8	6
isogroup303316	6	3	4	11	1	2	1	1	6	3
isogroup206383	6	9	5	3	1	2	1	1	5	5
isogroup110629	7	1	5	3	4	0	1	4	9	4
isogroup331406	7	1	5	10	3	1	2	0	8	1
isogroup314262	7	1	11	3	0	1	2	0	11	2
isogroup81462	7	2	4	4	2	0	0	1	10	8
isogroup323167	7	3	6	9	1	3	0	0	9	0
isogroup1565	8	0	3	12	1	2	1	4	4	3
isogroup66862	8	0	4	6	0	3	3	1	9	4
isogroup314660	8	0	4	6	1	3	1	1	7	7
isogroup67874	8	0	4	6	2	1	3	0	12	2
isogroup327806	8	0	5	6	1	3	3	1	9	2
isogroup342854	8	0	9	9	0	3	0	0	8	1
isogroup64583	8	1	5	4	3	6	2	4	3	2
isogroup311953	8	1	8	6	0	1	1	0	10	3
isogroup327028	8	1	12	7	0	2	1	1	2	4
isogroup309316	8	2	4	10	1	0	3	1	6	3
isogroup34903	8	2	5	7	1	2	2	1	8	2
isogroup317414	8	2	6	6	0	1	2	1	7	5
isogroup3386	8	2	7	8	0	1	2	2	3	5
isogroup335354	8	2	10	6	1	3	0	0	6	2
isogroup131532	8	3	2	3	2	4	4	7	0	5
isogroup362164	8	3	8	5	2	3	2	1	5	1
isogroup318048	9	0	3	7	0	3	5	3	3	5
isogroup72108	9	0	5	6	1	3	1	0	6	7
isogroup207796	9	0	6	4	1	4	2	0	6	6
isogroup310251	9	0	7	8	0	3	0	0	6	5
isogroup320838	9	0	8	5	3	1	1	3	4	4
isogroup311577	9	0	8	7	0	2	1	0	7	4
isogroup189450	9	0	8	7	2	3	0	0	4	5
isogroup316482	9	0	12	4	1	2	1	0	6	3
isogroup323889	9	1	6	11	0	1	0	2	7	1
isogroup41714	9	1	8	9	1	1	0	1	7	1
isogroup329029	9	2	4	7	1	2	2	2	7	2
isogroup150476	9	2	4	10	1	0	3	1	2	6
isogroup325830	9	2	6	8	1	3	4	0	4	1
isogroup313529	9	2	11	4	0	1	0	0	8	3
isogroup244921	9	3	3	5	2	6	2	5	3	0
isogroup105427	9	3	5	11	0	2	1	0	6	1
isogroup177735	9	4	2	2	2	3	3	5	4	4
isogroup316863	9	4	5	9	0	1	1	1	1	7
isogroup321679	9	5	8	3	2	4	1	1	4	1
isogroup5746	10	0	7	7	2	2	2	0	5	3
isogroup307084	10	0	8	8	0	3	1	1	5	2
isogroup310935	10	1	4	13	0	1	0	0	6	3
isogroup319216	10	1	5	9	1	1	1	0	6	4
isogroup335677	10	1	8	4	2	4	0	1	7	1
isogroup318739	10	1	8	6	0	2	0	1	8	2
isogroup364258	10	1	9	3	1	1	4	0	7	2
isogroup329617	10	2	6	6	0	5	0	0	8	1
isogroup151761	11	0	5	3	3	3	4	0	2	7
isogroup320741	11	0	7	6	0	1	0	0	8	5
isogroup120107	11	1	3	15	0	0	1	0	6	1
isogroup148478	11	1	6	7	2	3	1	0	4	3
isogroup315071	11	1	7	4	2	1	2	1	8	1
isogroup74722	11	1	9	7	2	1	1	0	4	2
isogroup182376	11	1	10	3	1	2	0	1	4	5
isogroup120841	11	2	2	13	0	0	1	0	6	3
isogroup312941	11	2	4	12	0	2	0	1	3	3
isogroup309355	11	2	6	6	2	2	0	3	4	2
isogroup76939	11	2	6	6	2	3	1	0	3	4
isogroup5346	11	3	4	6	2	1	1	1	6	3
isogroup459584	11	7	2	2	6	1	1	1	4	3
isogroup327392	12	0	7	4	0	1	1	1	9	3
isogroup309996	12	1	4	7	1	2	1	1	8	1
isogroup318662	12	1	6	6	0	3	1	1	5	3
isogroup314121	12	1	11	3	0	2	1	0	4	4
isogroup322599	12	1	11	3	2	1	0	0	5	3
isogroup302036	12	2	3	8	1	4	0	1	5	2
isogroup71623	12	2	7	3	0	3	1	1	7	2
isogroup72629	12	4	6	8	0	0	0	2	5	1
isogroup306906	13	0	5	6	1	1	4	1	6	1
isogroup317773	13	0	7	4	2	0	1	1	6	4
isogroup317359	13	1	5	3	3	2	1	0	7	3
isogroup306374	13	1	6	4	2	1	3	3	3	2
isogroup342174	13	2	12	0	0	5	0	1	4	1
isogroup314546	14	0	3	6	4	1	2	0	5	3
isogroup324046	14	0	10	3	0	2	0	0	6	3
isogroup131797	14	1	11	3	1	0	1	3	2	2
isogroup151686	14	2	6	6	1	0	0	2	4	3
isogroup322361	15	0	12	5	0	2	0	0	1	3
isogroup189027	16	1	9	4	1	0	0	1	3	3
isogroup352622	17	0	3	4	0	4	2	0	6	2
isogroup65173	20	0	5	1	2	1	0	0	7	2
isogroup372392	0	1	4	14	7	4	2	4	2	1
isogroup91635	0	1	11	1	2	0	0	3	3	18
isogroup347607	1	4	3	7	3	3	0	5	4	9
isogroup316095	2	1	7	12	0	1	3	0	8	5
isogroup316958	2	1	8	11	2	4	0	2	6	3
isogroup244714	2	3	9	1	2	3	0	4	7	8
isogroup178729	3	2	7	8	2	1	2	0	10	4
isogroup304732	4	1	5	18	0	1	4	1	5	0
isogroup313686	4	1	9	6	1	2	3	0	9	4
isogroup308328	4	2	7	14	0	3	1	0	2	6
isogroup257471	4	2	8	4	5	5	2	6	0	3
isogroup310690	5	0	7	7	1	4	1	4	7	3
isogroup320083	5	1	6	13	0	0	3	3	5	3
isogroup314348	5	1	9	6	2	3	1	2	5	5
isogroup328167	5	1	9	11	0	5	1	1	1	5
isogroup74727	5	2	2	11	2	4	3	0	6	4
isogroup301430	5	2	7	7	2	1	3	1	2	9
isogroup337135	5	2	7	9	2	2	1	1	5	5
isogroup146746	5	2	8	6	1	1	2	0	11	3
isogroup215670	5	4	4	3	2	10	1	5	1	4
isogroup203331	5	4	6	7	4	3	1	2	5	2
isogroup332963	6	0	6	10	0	6	0	1	7	3
isogroup301675	6	0	9	8	1	2	2	0	3	8
isogroup317569	6	0	9	9	1	3	2	0	5	4
isogroup315115	6	1	3	10	1	2	3	2	7	4
isogroup319632	6	1	6	7	1	1	3	1	10	3
isogroup309346	6	1	7	8	0	0	1	3	12	1
isogroup309719	6	1	8	10	3	1	3	1	2	4
isogroup325814	6	1	9	12	1	0	0	0	6	4
isogroup308656	6	2	6	5	3	5	2	1	4	5
isogroup303074	6	2	8	10	1	4	1	1	2	4
isogroup317568	6	3	4	5	2	1	1	1	8	8
isogroup338986	6	4	8	9	0	1	2	0	6	3
isogroup65179	6	4	13	4	2	1	4	0	3	2
isogroup318076	7	0	4	10	0	2	0	3	8	5
isogroup33091	7	0	5	11	0	3	0	1	9	3
isogroup64650	7	1	3	9	3	2	4	0	5	5
isogroup310717	7	1	5	5	3	3	1	0	8	6
isogroup316031	7	1	5	15	1	0	1	1	4	4
isogroup323191	7	1	8	10	1	1	1	0	5	5
isogroup97072	7	2	2	11	2	2	3	0	7	3
isogroup318999	7	2	6	15	0	1	1	0	5	2
isogroup664	7	2	10	7	1	0	1	1	5	5
isogroup384953	7	6	4	4	5	2	1	2	5	3
isogroup316278	8	0	6	8	4	2	1	1	7	2
isogroup309684	8	0	8	3	0	2	0	1	12	5
isogroup301160	8	1	3	9	5	1	4	0	2	6
isogroup319220	8	1	4	11	1	1	6	0	5	2
isogroup308718	8	1	5	12	1	2	2	2	5	1
isogroup79515	8	1	9	9	0	3	3	1	2	3
isogroup322926	8	1	9	10	0	3	0	0	4	4
isogroup305924	8	2	4	5	1	2	4	1	6	6
isogroup310872	8	2	7	7	0	4	0	2	6	3
isogroup41096	8	2	8	10	0	0	2	1	5	3
isogroup312129	8	3	9	4	1	1	3	0	5	5
isogroup204501	9	0	4	10	0	4	1	1	6	4
isogroup12	9	0	12	5	0	2	1	0	8	2
isogroup63804	9	1	7	6	1	0	1	0	8	6
isogroup23828	9	1	8	3	0	3	0	0	7	8
isogroup311085	9	1	9	4	1	1	1	0	9	4
isogroup319676	9	1	11	5	0	1	0	0	5	7
isogroup68258	9	2	5	7	0	2	1	2	7	4
isogroup307319	9	2	5	12	0	1	4	0	4	2
isogroup12065	9	2	10	5	1	2	2	0	6	2
isogroup317381	9	3	6	8	0	3	0	0	7	3
isogroup110668	9	3	7	8	0	1	5	0	3	3
isogroup330412	9	3	7	9	0	2	3	1	3	2
isogroup99637	10	0	2	13	3	1	3	0	4	3
isogroup310629	10	0	3	10	1	3	4	1	5	2
isogroup323720	10	0	4	11	0	1	2	1	4	6
isogroup323440	10	0	6	7	2	4	0	0	6	4
isogroup669	10	0	10	2	1	4	0	1	5	6
isogroup303552	10	1	6	14	1	2	1	1	2	1
isogroup314859	10	1	7	5	1	1	1	2	7	4
isogroup147730	10	1	8	2	0	3	2	0	6	7
isogroup20210	10	1	8	8	2	2	2	1	4	1
isogroup321896	10	1	9	1	1	2	5	0	3	7
isogroup317387	10	1	12	5	0	1	1	1	8	0
isogroup333011	10	2	6	8	1	2	2	1	5	2
isogroup294928	10	2	7	5	3	0	2	0	4	6
isogroup303209	10	3	5	8	2	1	1	0	5	4
isogroup316294	11	0	5	9	1	0	1	0	9	3
isogroup333627	11	0	6	5	1	7	2	1	5	1
isogroup311629	11	0	6	8	0	1	0	2	9	2
isogroup313140	11	0	8	4	1	2	1	4	3	5
isogroup330509	11	0	9	5	0	3	1	1	7	2
isogroup308922	11	1	4	6	2	3	5	0	4	3
isogroup132882	11	1	6	4	0	2	0	1	7	7
isogroup94909	11	1	7	3	1	4	1	0	6	5
isogroup325030	11	1	9	2	2	0	0	0	9	5
isogroup331844	11	2	6	4	0	2	1	0	10	3
isogroup349401	11	4	8	1	1	1	2	1	7	3
isogroup311213	12	0	4	7	1	1	4	1	3	6
isogroup146753	12	0	4	11	4	0	0	0	5	3
isogroup306826	12	0	7	7	3	3	0	1	4	2
isogroup85670	12	0	8	3	1	2	2	1	8	2
isogroup168173	12	0	9	6	0	1	1	1	8	1
isogroup326777	12	1	2	2	0	3	2	1	9	7
isogroup332636	12	1	7	7	1	3	1	1	5	1
isogroup337947	12	1	8	2	1	3	0	1	8	3
isogroup102585	12	2	6	6	1	1	1	0	4	6
isogroup316412	12	2	10	3	0	3	1	1	6	1
isogroup426737	12	4	1	2	2	6	2	2	5	3
isogroup314666	13	0	6	9	1	2	0	0	6	2
isogroup302407	13	0	6	12	1	0	0	1	4	2
isogroup309326	13	2	6	6	0	3	1	0	4	4
isogroup330154	13	3	8	3	1	3	1	2	3	2
isogroup322482	14	0	6	6	3	2	0	1	6	1
isogroup327552	14	0	7	5	1	3	1	0	5	3
isogroup122666	14	0	8	6	2	2	2	1	3	1
isogroup313509	14	1	8	6	0	2	0	0	5	3
isogroup152139	14	2	3	10	0	1	0	1	7	1
isogroup307320	14	2	6	1	2	3	2	2	4	3
isogroup334820	15	0	5	3	0	4	1	0	7	4
isogroup105135	15	1	7	8	0	0	2	0	2	4
isogroup325453	15	3	4	4	2	2	0	0	5	4
isogroup205267	15	6	3	1	2	2	2	2	4	2
isogroup14047	17	0	5	4	1	4	1	0	6	1
isogroup312723	17	0	6	4	0	1	1	1	7	2
isogroup324102	17	1	8	4	0	2	2	0	3	2
isogroup331917	17	2	7	2	0	1	1	0	6	3
isogroup56223	18	0	7	3	1	1	0	1	5	3
isogroup167746	18	1	6	2	0	3	0	3	4	2
isogroup305690	2	1	8	11	1	0	4	1	8	4
isogroup306598	4	0	6	8	0	2	3	0	12	5
isogroup152077	4	1	9	7	1	1	1	1	9	6
isogroup321301	4	2	17	3	0	0	1	3	4	6
isogroup206115	4	4	4	5	5	3	0	2	7	6
isogroup320785	5	1	5	11	2	1	4	2	3	6
isogroup299025	5	1	5	12	2	4	1	0	8	2
isogroup61949	5	1	5	13	1	2	1	2	5	5
isogroup45929	5	2	5	9	3	3	0	1	5	7
isogroup311587	6	0	5	10	1	2	2	1	6	7
isogroup67538	6	1	4	13	0	4	2	3	5	2
isogroup59383	6	1	5	9	2	2	3	0	7	5
isogroup322641	6	1	8	6	2	3	1	2	8	3
isogroup197975	6	2	5	4	1	8	2	4	5	3
isogroup305490	6	2	7	11	1	1	1	1	8	2
isogroup351871	6	2	11	8	0	3	1	1	6	2
isogroup203768	6	3	4	9	1	1	4	3	6	3
isogroup368640	6	3	8	2	3	6	2	4	3	3
isogroup66077	6	4	5	8	2	0	4	1	5	5
isogroup228424	6	5	4	7	2	5	1	3	4	3
isogroup312522	7	0	2	6	1	2	6	0	9	7
isogroup320584	7	0	3	7	1	5	1	1	11	4
isogroup149870	7	0	4	13	1	2	5	1	2	5
isogroup312022	7	0	5	9	5	1	0	1	10	2
isogroup307354	7	0	7	13	0	2	3	2	4	2
isogroup340567	7	0	8	9	1	3	0	3	6	3
isogroup313505	7	0	10	6	1	2	0	0	10	4
isogroup330776	7	0	12	2	0	7	5	1	5	1
isogroup310904	7	0	12	7	3	2	2	1	5	1
isogroup309141	7	1	5	14	2	4	1	0	4	2
isogroup319329	7	1	6	8	2	2	0	1	7	6
isogroup315386	7	1	8	4	1	1	1	1	11	5
isogroup73842	7	1	10	11	2	0	3	1	2	3
isogroup314970	7	2	3	14	0	0	7	0	4	3
isogroup92279	7	2	5	10	0	2	2	0	6	6
isogroup217340	7	2	7	1	4	2	1	6	6	4
isogroup146903	7	2	8	11	2	1	0	1	3	5
isogroup977	7	2	15	4	2	1	1	1	5	2
isogroup210472	7	3	7	2	1	8	1	7	3	1
isogroup341884	8	0	5	5	2	0	3	1	8	8
isogroup6717	8	0	5	11	1	0	3	1	5	6
isogroup311780	8	0	9	5	2	2	0	1	11	2
isogroup320390	8	0	12	3	1	2	0	0	9	5
isogroup320635	8	0	13	5	1	3	1	1	6	2
isogroup190567	8	1	3	9	0	5	3	1	6	4
isogroup324674	8	1	8	6	0	3	1	2	10	1
isogroup326953	8	1	9	4	0	1	2	2	10	3
isogroup147520	8	1	9	9	1	1	2	0	6	3
isogroup69438	8	2	6	8	0	3	2	1	7	3
isogroup315103	8	2	7	6	0	2	3	0	4	8
isogroup314893	8	2	7	9	0	2	3	2	5	2
isogroup327226	8	2	9	8	1	3	1	0	3	5
isogroup316569	8	2	13	7	1	2	0	1	5	1
isogroup231820	8	3	6	1	3	5	2	6	4	2
isogroup318136	8	3	6	3	2	2	3	3	8	2
isogroup309098	8	4	5	8	3	1	0	1	7	3
isogroup317231	9	0	4	8	4	1	2	1	5	6
isogroup53298	9	1	4	16	1	0	2	0	5	2
isogroup303814	9	1	6	3	1	4	7	3	4	2
isogroup316135	9	1	8	7	0	1	0	0	6	8
isogroup310426	9	1	12	8	1	1	3	0	4	1
isogroup307829	9	2	5	3	1	1	0	1	15	3
isogroup63075	9	2	5	6	2	2	3	2	6	3
isogroup326944	9	2	6	5	0	2	4	0	7	5
isogroup309382	10	0	6	9	0	2	3	2	5	3
isogroup309989	10	0	7	4	0	5	0	0	8	6
isogroup72452	10	0	9	4	0	1	4	3	7	2
isogroup311128	10	0	10	12	2	2	0	1	3	0
isogroup73070	10	1	4	7	2	2	0	0	10	4
isogroup305397	10	1	9	9	2	1	2	0	5	1
isogroup182249	10	2	8	6	0	1	0	1	9	3
isogroup363527	10	3	9	3	0	2	3	0	7	3
isogroup322646	10	4	4	3	1	3	1	6	6	2
isogroup305468	10	5	1	11	1	1	3	1	6	1
isogroup78284	11	0	5	6	1	15	0	0	1	1
isogroup321769	11	0	8	4	2	2	1	2	6	4
isogroup397400	11	0	8	5	2	2	3	5	2	2
isogroup321328	11	0	9	4	2	4	2	0	4	4
isogroup298055	11	1	1	9	3	0	2	1	7	5
isogroup313307	11	1	8	9	1	4	0	0	4	2
isogroup359563	11	1	9	2	2	1	1	1	9	3
isogroup313470	11	1	10	5	0	1	1	0	9	2
isogroup159569	11	1	10	9	1	1	2	0	3	2
isogroup324851	12	0	3	4	0	4	2	2	8	5
isogroup18136	12	0	6	6	0	4	0	1	8	3
isogroup325083	12	0	6	7	2	1	1	0	6	5
isogroup313092	12	0	7	7	2	2	1	1	5	3
isogroup59585	12	0	9	3	0	4	1	0	8	3
isogroup306754	12	0	13	0	3	2	2	0	6	2
isogroup310315	12	1	4	12	1	1	2	1	2	4
isogroup319978	12	1	6	10	0	0	0	1	6	4
isogroup322084	12	1	7	9	0	2	1	0	5	3
isogroup308496	12	1	8	6	0	3	0	0	8	2
isogroup315397	12	1	9	5	1	3	0	0	8	1
isogroup9915	12	1	11	4	0	0	1	2	5	4
isogroup296707	12	2	3	7	3	1	1	1	4	6
isogroup306721	12	2	7	6	2	0	0	2	7	2
isogroup337363	12	2	8	5	0	3	3	1	3	3
isogroup343389	12	2	11	8	0	1	0	0	5	1
isogroup309364	12	3	5	5	0	3	1	0	9	2
isogroup301372	12	3	6	8	1	1	1	0	6	2
isogroup312658	13	1	6	8	0	1	0	0	6	5
isogroup331769	13	1	7	4	1	1	1	3	5	4
isogroup322909	13	2	2	11	0	2	2	0	4	4
isogroup321381	13	2	10	7	1	2	0	0	3	2
isogroup15506	14	0	5	4	0	5	1	0	8	3
isogroup77376	14	0	6	8	1	0	2	1	6	2
isogroup307832	14	0	9	2	0	3	1	1	6	4
isogroup306666	14	1	6	11	2	0	0	1	4	1
isogroup7906	14	1	9	5	0	0	3	0	6	2
isogroup327640	14	1	10	7	1	1	1	0	4	1
isogroup333656	14	2	2	5	1	3	0	2	7	4
isogroup70689	14	5	6	4	0	0	5	0	4	2
isogroup62330	15	0	6	3	3	1	1	0	7	4
isogroup339946	15	0	7	2	1	3	0	0	7	5
isogroup22162	15	0	8	2	3	3	0	1	5	3
isogroup304390	15	0	8	5	1	2	0	1	5	3
isogroup315798	15	2	5	7	0	1	0	0	6	4
isogroup319869	15	4	3	11	0	2	2	1	0	2
isogroup79407	16	1	4	7	0	0	1	0	7	4
isogroup107657	16	1	5	8	0	5	1	0	4	0
isogroup343989	16	2	0	0	5	3	0	10	4	0
isogroup343036	16	3	4	3	1	2	0	2	6	3
isogroup331469	17	2	6	4	1	1	2	2	5	0
isogroup314697	17	2	6	6	2	0	0	1	4	2
isogroup22956	18	0	10	1	0	2	2	0	5	2
isogroup215775	2	2	5	6	1	8	3	4	2	8
isogroup321538	3	2	12	9	0	3	1	0	6	5
isogroup314334	3	4	10	6	1	3	1	0	5	8
isogroup17905	4	1	6	14	0	1	3	1	6	5
isogroup60070	4	1	7	10	3	0	3	0	9	4
isogroup74968	4	2	10	6	0	1	1	1	10	6
isogroup127448	4	2	11	4	0	2	0	1	14	3
isogroup153623	4	5	5	2	5	3	0	3	7	7
isogroup322732	5	0	4	9	1	0	6	1	11	4
isogroup1841	5	0	7	8	1	0	1	2	7	10
isogroup96509	5	1	5	14	5	3	2	1	3	2
isogroup305368	5	1	8	8	1	4	7	0	5	2
isogroup73528	5	1	8	9	1	2	3	0	9	3
isogroup89472	5	1	10	9	2	1	1	1	8	3
isogroup84656	5	1	10	10	1	1	1	0	5	7
isogroup323207	5	2	6	14	0	3	2	2	4	3
isogroup96439	5	2	7	9	0	2	2	1	9	4
isogroup318099	5	3	6	12	3	1	1	1	5	4
isogroup77249	6	0	5	9	1	2	2	4	7	5
isogroup6660	6	0	8	12	0	7	3	3	1	1
isogroup349079	6	0	10	10	0	3	0	1	5	6
isogroup187601	6	2	4	1	1	7	4	6	4	6
isogroup322739	6	3	12	8	2	0	1	1	7	1
isogroup374971	6	4	7	5	1	8	1	2	5	2
isogroup65798	6	5	8	1	1	6	2	2	4	6
isogroup238138	7	0	3	4	3	6	0	7	5	6
isogroup313539	7	0	13	4	2	3	2	0	7	3
isogroup301589	7	1	7	13	1	1	3	0	5	3
isogroup325252	7	1	11	7	0	0	1	1	7	6
isogroup171282	7	1	16	6	1	2	0	0	4	4
isogroup306590	7	2	4	10	0	0	2	2	11	3
isogroup168765	7	2	5	15	0	1	4	1	3	3
isogroup346885	7	2	7	3	2	8	3	2	4	3
isogroup311441	7	3	4	11	1	3	1	1	4	6
isogroup202055	7	7	3	3	3	3	2	4	5	4
isogroup320426	8	0	2	9	0	0	2	1	13	6
isogroup10263	8	0	4	5	0	4	1	3	11	5
isogroup308434	8	0	9	5	3	1	2	1	7	5
isogroup328327	8	0	11	7	0	2	1	2	7	3
isogroup330176	8	0	11	8	0	3	0	1	4	6
isogroup307141	8	1	4	16	0	0	0	0	10	2
isogroup309374	8	1	8	6	0	4	1	0	9	4
isogroup82110	8	1	8	8	1	1	2	3	6	3
isogroup69183	8	1	8	9	2	1	3	0	4	5
isogroup311141	8	1	8	12	0	2	1	1	5	3
isogroup317344	8	1	10	6	0	6	1	1	7	1
isogroup318369	8	1	12	8	0	2	2	1	4	3
isogroup55409	8	2	11	6	1	1	5	2	2	3
isogroup241510	8	5	1	1	3	5	4	6	4	4
isogroup214721	8	5	3	3	3	5	1	2	8	3
isogroup119635	8	8	2	2	3	6	1	5	3	3
isogroup326881	9	0	7	7	0	3	0	2	7	6
isogroup314766	9	0	7	10	0	3	1	1	5	5
isogroup333661	9	0	9	14	0	0	2	0	3	4
isogroup312749	9	0	13	3	1	4	1	1	5	4
isogroup331036	9	1	3	4	4	2	4	1	8	5
isogroup302112	9	1	6	10	4	1	0	0	7	3
isogroup329246	9	1	7	6	2	3	1	1	6	5
isogroup108892	9	1	7	7	0	5	1	1	5	5
isogroup336583	9	1	8	2	0	8	1	1	7	4
isogroup360514	9	2	4	9	1	2	2	1	6	5
isogroup125357	9	2	4	11	0	2	4	1	5	3
isogroup204153	9	2	10	4	2	2	2	0	6	4
isogroup320783	9	2	12	5	0	3	1	0	8	1
isogroup322429	9	3	2	12	5	1	1	0	5	3
isogroup311006	9	3	5	8	2	1	5	1	4	3
isogroup158013	9	5	6	8	0	1	1	0	7	4
isogroup150918	9	6	5	2	1	3	1	3	6	5
isogroup108287	10	0	5	11	2	3	3	1	6	0
isogroup314976	10	0	11	8	0	0	1	2	8	1
isogroup335817	10	1	5	4	0	5	1	0	11	4
isogroup42067	10	1	6	9	0	2	0	1	5	7
isogroup350092	10	1	7	6	0	4	0	1	6	6
isogroup326127	10	1	8	6	0	7	2	0	4	3
isogroup210797	10	2	1	1	3	9	3	3	3	6
isogroup301185	10	2	4	12	1	0	1	0	9	2
isogroup302692	10	3	8	4	1	2	2	1	6	4
isogroup321298	10	4	4	5	1	4	0	0	5	8
isogroup318164	10	4	4	6	1	4	6	1	3	2
isogroup189627	10	5	5	2	2	7	5	2	3	0
isogroup308327	11	0	2	6	1	0	2	2	11	6
isogroup344471	11	0	14	6	1	0	0	0	6	3
isogroup144877	11	1	5	2	2	11	0	0	6	3
isogroup311730	11	1	6	5	0	2	2	2	8	4
isogroup59782	11	1	11	7	1	2	1	0	3	4
isogroup327420	11	2	6	5	0	4	2	0	7	4
isogroup314831	11	2	8	7	1	3	0	0	8	1
isogroup332436	11	2	9	9	1	3	1	1	1	3
isogroup97686	12	0	4	10	0	2	1	0	11	1
isogroup81255	12	0	8	8	1	1	3	0	2	6
isogroup60906	12	0	9	4	4	3	0	0	5	4
isogroup314979	12	0	11	3	1	5	3	0	5	1
isogroup344768	12	0	13	1	1	1	0	0	11	2
isogroup315377	12	1	5	4	5	1	4	0	3	6
isogroup307157	12	1	8	6	1	2	3	0	6	2
isogroup309227	12	1	12	5	0	2	0	0	3	6
isogroup308940	12	2	2	4	2	2	1	0	12	4
isogroup95211	12	2	8	5	5	0	1	0	5	3
isogroup315208	12	2	10	5	1	2	1	0	4	4
isogroup21271	12	3	5	3	2	2	1	1	9	3
isogroup327923	13	0	8	6	0	0	1	0	5	8
isogroup69598	13	0	10	3	0	4	0	0	7	4
isogroup334826	13	0	10	6	1	0	1	1	6	3
isogroup325865	13	1	11	4	1	3	3	1	3	1
isogroup349077	13	3	6	3	2	5	0	3	4	2
isogroup327922	14	0	7	4	2	5	1	3	3	2
isogroup82461	14	1	5	10	0	1	1	0	6	3
isogroup310757	14	2	6	6	2	3	1	0	4	3
isogroup353900	14	3	8	5	0	4	1	1	5	0
isogroup83161	15	0	12	5	0	0	0	1	2	6
isogroup316838	16	1	4	5	2	4	0	1	3	5
isogroup4987	17	0	12	2	0	3	1	0	4	2
isogroup321455	17	1	6	7	0	3	1	1	4	1
isogroup40894	18	1	7	3	0	4	0	0	4	4
isogroup317411	18	1	8	0	0	3	1	1	5	4
isogroup313099	18	1	8	1	0	6	1	1	5	0
isogroup362877	19	0	9	0	1	7	0	1	2	2
isogroup315684	1	0	8	16	1	0	4	1	5	6
isogroup64768	4	2	4	12	4	3	4	1	3	5
isogroup110258	4	2	9	11	0	3	3	3	6	1
isogroup320257	4	2	10	8	1	3	0	0	9	5
isogroup107959	4	4	1	4	2	6	4	4	10	3
isogroup169039	5	0	15	0	2	1	1	6	4	8
isogroup326310	5	1	11	7	0	2	1	2	7	6
isogroup323670	5	2	7	10	2	3	1	0	9	3
isogroup306634	5	2	13	10	0	3	2	1	4	2
isogroup129409	5	4	5	1	3	14	2	2	2	4
isogroup153342	5	8	6	5	0	6	2	3	5	2
isogroup321057	6	0	6	6	1	1	4	1	8	9
isogroup317250	6	0	8	6	3	3	2	0	9	5
isogroup328476	6	0	9	12	1	0	5	0	5	4
isogroup303648	6	1	2	19	2	0	3	1	7	1
isogroup311581	6	1	8	14	0	1	2	4	1	5
isogroup75747	6	1	9	9	3	4	0	1	8	1
isogroup18683	6	1	10	9	2	0	2	1	5	6
isogroup335577	6	2	3	2	2	11	6	0	6	4
isogroup32920	6	2	7	12	0	4	1	0	9	1
isogroup60526	6	2	9	11	1	3	1	1	5	3
isogroup92437	6	2	11	8	1	2	0	0	5	7
isogroup360417	6	3	4	4	7	4	2	2	5	5
isogroup219535	6	4	4	3	1	7	1	10	5	1
isogroup313416	7	0	8	11	2	4	0	1	5	4
isogroup12037	7	0	12	5	2	2	1	0	5	8
isogroup20567	7	1	5	11	5	1	2	0	5	5
isogroup227106	7	1	5	14	0	1	4	3	2	5
isogroup398444	7	1	7	3	4	5	2	4	3	6
isogroup320101	7	1	7	7	0	3	2	1	9	5
isogroup72057	7	1	10	8	2	4	1	0	5	4
isogroup309311	7	1	11	6	1	2	3	1	6	4
isogroup304269	7	2	4	10	0	2	3	1	9	4
isogroup122685	7	2	8	4	1	4	5	1	4	6
isogroup69891	7	2	13	5	1	3	2	3	4	2
isogroup322573	7	3	6	8	1	3	2	2	4	6
isogroup309276	7	3	8	8	0	0	1	2	8	5
isogroup317082	8	1	3	19	1	0	2	0	4	4
isogroup63338	8	1	6	7	3	4	2	0	8	3
isogroup160820	8	1	6	11	1	3	0	2	7	3
isogroup90252	8	1	7	13	1	3	3	1	1	4
isogroup78239	8	1	9	14	0	0	1	2	3	4
isogroup309016	8	1	10	6	1	2	0	0	8	6
isogroup329086	8	1	10	7	1	3	2	0	3	7
isogroup337098	8	2	6	4	1	2	1	2	11	5
isogroup313479	8	2	10	7	1	1	1	1	8	3
isogroup191635	9	0	1	21	0	2	1	0	3	5
isogroup326270	9	0	7	10	1	5	1	1	5	3
isogroup309459	9	0	10	6	1	1	1	0	9	5
isogroup92195	9	0	10	7	2	0	0	2	4	8
isogroup16972	9	1	3	10	1	2	2	0	12	2
isogroup313688	9	1	5	8	2	3	2	0	8	4
isogroup92519	9	1	7	11	1	2	1	1	7	2
isogroup308348	9	1	9	5	0	8	1	1	5	3
isogroup317118	9	2	3	13	3	1	2	0	6	3
isogroup315011	9	2	8	9	0	2	0	1	5	6
isogroup73757	10	0	8	8	3	0	1	1	9	2
isogroup318527	10	0	8	10	1	4	1	1	4	3
isogroup298746	10	0	9	9	2	1	2	0	7	2
isogroup327349	10	0	12	4	2	3	2	1	5	3
isogroup339648	10	0	12	9	1	2	0	0	3	5
isogroup319246	10	0	13	7	0	2	0	2	6	2
isogroup61002	10	1	10	9	1	1	0	1	5	4
isogroup84431	10	2	13	5	2	2	0	0	6	2
isogroup314461	11	0	4	14	2	0	1	1	4	5
isogroup315192	11	0	5	8	1	2	2	1	7	5
isogroup309863	11	0	6	6	1	1	1	2	4	10
isogroup324246	11	0	9	5	2	1	1	0	6	7
isogroup314590	11	1	12	6	0	1	3	0	5	3
isogroup305752	11	2	8	6	1	0	2	3	5	4
isogroup325282	11	2	12	5	1	1	0	0	6	4
isogroup320019	11	3	5	12	0	0	1	0	9	1
isogroup312770	11	4	4	4	2	1	2	1	5	8
isogroup314959	12	0	3	6	3	2	3	4	6	3
isogroup71789	12	0	8	9	0	3	0	0	6	4
isogroup76148	12	0	11	7	3	3	1	0	5	0
isogroup322871	12	0	11	8	0	2	0	2	6	1
isogroup307184	12	1	5	10	0	3	1	1	5	4
isogroup305806	12	1	9	8	0	0	1	0	6	5
isogroup319063	12	1	10	5	1	4	1	1	5	2
isogroup308814	12	2	6	9	1	1	1	1	7	2
isogroup70047	12	2	7	5	2	1	1	2	6	4
isogroup44669	12	2	8	7	2	1	2	0	7	1
isogroup341411	12	2	8	9	1	4	0	0	5	1
isogroup321653	12	3	11	6	1	0	2	0	6	1
isogroup313200	12	4	5	9	1	1	0	0	6	4
isogroup320289	13	0	10	5	1	2	1	0	8	2
isogroup309022	13	1	5	7	3	1	3	0	6	3
isogroup304855	13	2	5	9	1	2	1	0	7	2
isogroup61435	13	2	7	2	0	4	3	0	8	3
isogroup324065	14	0	3	7	1	1	1	0	10	5
isogroup95477	14	0	7	8	0	2	0	2	6	3
isogroup306687	14	1	3	8	1	4	5	0	4	2
isogroup317881	14	1	4	5	2	0	2	2	9	3
isogroup328501	14	1	7	9	1	2	2	1	3	2
isogroup328417	14	1	8	7	0	3	0	1	5	3
isogroup6298	14	1	10	2	1	2	1	2	9	0
isogroup34285	14	2	11	3	0	6	0	0	5	1
isogroup312934	14	2	11	3	1	2	1	0	5	3
isogroup325889	14	3	7	3	1	2	1	1	6	4
isogroup323924	15	0	10	1	0	2	1	1	8	4
isogroup318738	15	1	6	8	2	1	1	0	6	2
isogroup322276	15	2	8	6	0	2	1	1	4	3
isogroup149893	15	3	4	9	1	1	0	0	7	2
isogroup316947	16	0	8	6	1	2	1	0	7	1
isogroup107299	16	0	12	4	1	1	0	0	7	1
isogroup57139	16	1	7	5	0	0	3	2	3	5
isogroup189832	16	1	8	9	0	2	0	2	2	2
isogroup353989	16	2	8	4	1	2	1	1	6	1
isogroup300607	16	4	5	6	0	0	1	1	5	4
isogroup331903	17	0	5	7	0	6	1	1	4	1
isogroup324108	17	2	8	2	2	1	2	1	3	4
isogroup326380	19	0	5	3	1	1	1	2	8	2
isogroup42114	20	1	3	4	1	1	1	2	8	1
isogroup94570	2	1	10	12	4	1	2	3	5	3
isogroup339617	3	1	17	1	2	0	0	0	8	11
isogroup310606	3	4	2	13	1	2	4	1	8	5
isogroup307769	3	4	7	14	1	1	4	0	4	5
isogroup98027	4	1	8	13	2	1	2	0	6	6
isogroup320921	4	2	6	9	3	7	3	1	6	2
isogroup88989	4	4	10	7	0	4	8	1	3	2
isogroup301484	5	1	4	10	0	3	3	1	10	6
isogroup304731	5	1	7	13	3	1	1	2	9	1
isogroup310122	5	3	7	12	0	1	3	1	4	7
isogroup371696	5	3	9	7	1	3	0	1	6	8
isogroup319097	5	4	9	14	1	2	0	0	6	2
isogroup113319	5	11	2	1	2	7	0	2	5	8
isogroup308436	6	0	4	13	0	2	2	2	8	6
isogroup310682	6	0	7	6	0	2	5	1	15	1
isogroup88696	6	0	11	11	2	1	3	1	4	4
isogroup312604	6	1	8	9	1	0	1	1	12	4
isogroup131322	6	1	8	15	2	3	2	0	3	3
isogroup326211	6	1	11	7	2	1	2	0	9	4
isogroup314618	6	2	8	11	2	1	3	2	7	1
isogroup340124	6	2	16	0	1	0	2	1	7	8
isogroup63748	6	4	8	13	1	0	2	0	6	3
isogroup239456	6	6	8	4	2	4	3	4	0	6
isogroup41268	7	0	6	10	1	1	3	1	11	3
isogroup300983	7	0	12	10	0	2	1	2	7	2
isogroup313386	7	1	3	18	0	1	5	0	4	4
isogroup314344	7	2	9	8	2	1	0	3	6	5
isogroup41350	7	4	6	9	1	4	1	2	5	4
isogroup347643	7	5	3	1	7	11	1	3	3	2
isogroup319137	8	0	5	7	1	4	1	1	8	8
isogroup74065	8	0	7	11	3	2	2	1	6	3
isogroup11551	8	0	8	11	1	1	3	0	8	3
isogroup107327	8	0	8	11	1	2	1	0	6	6
isogroup59250	8	0	14	3	1	1	1	2	10	3
isogroup316798	8	1	5	11	2	3	3	1	3	6
isogroup333503	8	1	6	6	3	0	1	2	8	8
isogroup324301	8	1	9	12	2	3	1	1	0	6
isogroup58530	8	2	11	11	1	0	2	2	5	1
isogroup452921	8	3	2	4	7	9	2	3	1	4
isogroup141578	8	3	7	12	0	0	2	2	4	5
isogroup201888	8	3	13	7	0	3	0	1	6	2
isogroup99997	8	4	9	7	0	0	2	1	6	6
isogroup306555	9	1	3	9	1	1	5	2	8	4
isogroup311592	9	1	4	7	2	5	1	4	5	5
isogroup211940	9	1	6	5	1	5	2	4	7	3
isogroup311124	9	1	9	9	0	2	3	1	7	2
isogroup326819	9	1	11	6	2	3	1	2	4	4
isogroup318552	9	1	13	5	1	3	0	1	7	3
isogroup3453	9	1	13	5	3	2	1	1	6	2
isogroup317649	9	2	9	8	4	1	3	1	5	1
isogroup307892	9	2	10	5	1	3	0	2	6	5
isogroup314245	9	3	9	7	1	1	1	0	6	6
isogroup308777	9	3	11	7	0	3	3	0	5	2
isogroup318169	9	4	9	8	0	2	0	0	6	5
isogroup316044	9	5	10	8	1	1	1	0	7	1
isogroup317471	10	0	5	11	1	3	3	0	4	6
isogroup6644	10	0	7	3	0	5	1	3	9	5
isogroup305919	10	0	7	10	1	0	1	2	9	3
isogroup315497	10	1	8	9	0	2	1	1	6	5
isogroup321110	10	2	6	3	1	7	1	1	5	7
isogroup314359	10	2	8	7	1	2	2	0	7	4
isogroup108322	10	2	9	11	0	0	0	1	7	3
isogroup299819	10	4	7	11	0	0	0	1	4	6
isogroup314146	10	4	9	5	0	3	1	0	10	1
isogroup154350	11	0	4	12	0	2	2	3	6	3
isogroup103764	11	1	5	11	3	1	0	0	5	6
isogroup321272	11	1	6	8	3	1	3	3	5	2
isogroup324937	11	1	7	5	1	2	2	1	6	7
isogroup307954	11	1	7	11	0	1	5	0	6	1
isogroup314934	11	1	8	5	3	4	1	2	2	6
isogroup335642	11	3	7	8	0	0	2	0	7	5
isogroup307210	11	4	7	6	0	3	0	2	8	2
isogroup46834	12	0	2	7	0	2	5	0	5	10
isogroup1358	12	0	8	7	5	3	1	0	4	3
isogroup320220	12	0	8	8	0	4	1	1	5	4
isogroup335076	12	0	9	8	2	3	1	0	4	4
isogroup323273	12	0	11	6	2	0	1	2	7	2
isogroup331602	12	0	11	7	0	1	1	0	10	1
isogroup335367	12	1	6	10	1	1	0	0	7	5
isogroup23616	12	1	7	9	1	2	3	1	4	3
isogroup302460	12	1	11	7	0	1	1	1	4	5
isogroup350627	12	2	3	5	1	1	3	0	10	6
isogroup326299	12	2	6	4	0	4	2	2	6	5
isogroup303035	12	2	8	5	2	2	3	0	6	3
isogroup316245	12	2	9	9	2	0	1	0	6	2
isogroup1316	12	2	10	6	0	1	2	1	3	6
isogroup318730	12	3	6	9	1	0	3	0	5	4
isogroup62234	13	0	2	1	0	13	0	0	12	2
isogroup316702	13	0	6	4	0	0	2	0	13	5
isogroup320528	13	0	6	4	0	4	1	2	8	5
isogroup302378	13	1	8	6	0	3	1	1	7	3
isogroup322835	13	2	10	9	1	0	1	2	4	1
isogroup229582	13	4	2	6	2	0	5	2	4	5
isogroup100399	13	4	4	10	0	0	4	0	5	3
isogroup325627	13	5	5	9	0	1	3	1	3	3
isogroup312254	14	0	5	5	1	1	3	0	5	9
isogroup319454	14	0	6	4	1	2	0	0	9	7
isogroup327687	14	0	9	5	0	5	0	0	6	4
isogroup151073	14	1	8	6	2	1	0	1	5	5
isogroup305731	14	3	5	14	1	3	0	1	2	0
isogroup326616	15	0	9	5	1	4	0	1	7	1
isogroup325415	15	0	10	5	1	2	2	0	4	4
isogroup105879	15	1	3	4	4	5	1	0	6	4
isogroup302007	15	1	5	14	1	0	2	0	4	1
isogroup315480	15	1	9	2	2	2	0	0	7	5
isogroup320664	15	2	7	3	1	2	0	0	6	7
isogroup324225	16	0	4	6	0	2	0	0	11	4
isogroup346397	16	0	5	6	0	3	1	3	6	3
isogroup54911	16	1	8	10	0	0	4	1	2	1
isogroup109299	17	2	3	7	0	1	3	1	6	3
isogroup38605	17	2	6	1	0	10	0	0	7	0
isogroup311121	19	0	13	1	0	2	1	0	4	3
isogroup7656	28	4	0	0	0	4	3	1	0	3
isogroup188064	3	4	4	5	4	3	1	7	4	9
isogroup228179	3	10	7	1	3	9	0	5	3	3
isogroup6139	5	0	11	7	2	8	0	2	5	4
isogroup301599	5	2	5	19	0	0	4	0	3	6
isogroup314100	5	2	8	17	2	0	4	1	2	3
isogroup313426	5	3	8	9	0	1	4	4	8	2
isogroup72024	6	0	6	13	0	2	3	2	5	7
isogroup65139	6	0	7	14	1	2	1	0	8	5
isogroup3337	6	1	5	6	2	4	4	3	9	4
isogroup300785	6	1	6	14	1	0	7	1	7	1
isogroup315792	6	1	6	16	1	1	3	1	6	3
isogroup314820	6	1	11	12	0	0	4	2	5	3
isogroup15772	6	1	13	9	0	3	1	0	8	3
isogroup233151	6	2	3	13	3	4	5	2	5	1
isogroup325151	6	2	8	11	0	3	3	0	8	3
isogroup305694	7	0	11	16	0	2	0	1	4	3
isogroup309941	7	0	14	9	2	1	1	1	3	6
isogroup314717	7	1	5	12	1	4	6	0	5	3
isogroup59953	7	1	7	8	4	1	3	3	5	5
isogroup335122	7	1	12	6	0	3	2	1	7	5
isogroup9068	7	1	12	8	0	2	3	0	6	5
isogroup306058	7	2	6	7	4	2	1	2	12	1
isogroup324913	7	2	9	7	1	4	0	1	10	3
isogroup298705	7	3	8	13	2	1	2	3	5	0
isogroup70070	7	3	11	3	1	6	2	0	4	7
isogroup314942	7	4	4	9	0	2	1	1	9	7
isogroup301668	7	4	4	14	4	1	4	0	5	1
isogroup220221	7	4	5	7	1	8	3	7	2	0
isogroup180514	7	9	6	1	2	5	3	1	5	5
isogroup76918	8	1	3	15	0	2	6	0	4	5
isogroup322296	8	1	5	5	1	3	2	2	12	5
isogroup59523	8	1	6	12	1	0	2	2	9	3
isogroup73700	8	1	7	10	1	2	3	0	6	6
isogroup316541	8	1	8	9	2	3	4	1	5	3
isogroup320335	8	1	8	10	2	0	2	2	6	5
isogroup38520	8	2	4	11	1	5	2	0	6	5
isogroup106341	8	2	11	3	0	4	6	0	8	2
isogroup53194	8	4	8	7	0	1	2	1	7	6
isogroup303170	9	0	7	8	4	2	5	0	7	2
isogroup308476	9	1	6	11	1	1	4	2	4	5
isogroup323335	9	1	7	12	1	0	1	0	9	4
isogroup67172	9	2	6	10	1	2	0	2	6	6
isogroup306866	9	2	7	8	2	1	0	2	9	4
isogroup304398	9	3	2	12	1	3	0	1	9	4
isogroup225346	9	3	4	9	1	3	3	2	6	4
isogroup305299	9	3	5	12	1	2	3	1	3	5
isogroup329388	9	4	13	4	0	4	1	0	8	1
isogroup316508	10	0	5	6	1	4	1	3	12	2
isogroup42266	10	0	5	12	0	7	4	1	4	1
isogroup330018	10	0	8	3	0	4	0	3	10	6
isogroup333303	10	0	8	9	1	4	0	2	6	4
isogroup62655	10	0	9	8	1	3	1	2	8	2
isogroup306683	10	1	7	9	1	0	3	2	7	4
isogroup99053	10	1	9	9	0	2	4	0	7	2
isogroup312058	10	1	10	9	2	2	1	0	6	3
isogroup215679	10	2	7	7	3	3	0	5	3	4
isogroup309193	10	2	8	4	2	1	2	4	4	7
isogroup71148	10	2	8	10	0	3	2	2	4	3
isogroup79162	10	2	10	4	5	2	1	1	5	4
isogroup331220	10	2	11	9	0	1	1	1	6	3
isogroup318972	10	2	13	4	2	2	0	2	8	1
isogroup309274	10	3	8	2	1	2	3	3	10	2
isogroup331766	10	3	10	4	2	2	0	2	10	1
isogroup319491	10	3	11	8	1	1	1	0	6	3
isogroup98957	10	4	6	9	1	2	0	4	5	3
isogroup226504	10	6	4	5	2	6	3	3	0	5
isogroup314432	11	0	2	8	1	4	0	2	9	7
isogroup298714	11	0	4	9	1	2	1	0	8	8
isogroup65372	11	0	8	7	5	0	4	2	4	3
isogroup317597	11	0	9	5	2	5	0	1	5	6
isogroup42566	11	1	8	2	3	6	1	5	5	2
isogroup338856	11	1	8	10	2	1	5	0	5	1
isogroup310371	11	2	6	8	2	2	3	2	7	1
isogroup68703	11	2	6	12	1	0	1	1	6	4
isogroup318435	11	2	10	8	1	1	3	2	4	2
isogroup59456	11	2	10	8	1	3	1	0	4	4
isogroup330707	11	3	6	8	0	3	0	1	10	2
isogroup151630	11	3	6	9	0	2	1	1	9	2
isogroup73318	11	3	9	4	0	0	1	2	6	8
isogroup25295	11	3	12	6	0	1	0	0	3	8
isogroup309986	12	0	9	4	1	3	1	1	9	4
isogroup323747	12	0	14	7	0	3	1	0	5	2
isogroup311421	12	1	7	6	4	1	1	1	7	4
isogroup316289	12	1	8	10	2	1	1	1	4	4
isogroup312972	12	1	12	7	1	3	0	0	7	1
isogroup303405	12	2	3	10	2	2	3	2	8	0
isogroup324754	12	2	7	14	0	3	1	1	1	3
isogroup319619	12	2	8	10	1	4	0	0	4	3
isogroup315558	12	3	7	8	0	0	5	0	7	2
isogroup197723	13	0	5	6	3	6	1	4	5	1
isogroup336126	13	0	8	5	5	2	2	0	3	6
isogroup319789	13	0	8	8	0	3	0	0	9	3
isogroup96580	13	0	9	5	0	4	1	0	8	4
isogroup220119	13	1	1	6	0	6	1	0	12	4
isogroup311708	13	1	6	7	0	4	3	1	6	3
isogroup149546	13	1	7	8	3	1	1	2	7	1
isogroup321490	13	1	8	7	1	1	1	1	7	4
isogroup30770	13	1	8	9	0	2	1	0	7	3
isogroup309224	13	1	10	5	1	2	1	1	6	4
isogroup315216	13	1	10	6	2	2	1	0	5	4
isogroup8172	13	1	13	3	1	3	0	2	7	1
isogroup305275	13	2	5	8	0	0	1	3	9	3
isogroup324202	13	2	9	4	2	0	1	2	7	4
isogroup298634	13	3	5	6	0	4	1	0	7	5
isogroup329096	13	3	6	6	0	0	3	0	6	7
isogroup147475	13	3	9	6	2	6	0	2	2	1
isogroup207324	14	1	7	7	2	1	0	3	2	7
isogroup312639	14	2	6	8	0	2	2	0	7	3
isogroup98797	15	0	9	5	0	0	1	0	7	7
isogroup73096	15	0	10	3	0	2	2	0	6	6
isogroup306854	15	1	4	8	1	2	2	1	5	5
isogroup329877	16	0	12	6	1	1	1	0	3	4
isogroup305921	16	1	12	3	0	3	3	0	5	1
isogroup313757	17	1	8	6	4	1	0	0	5	2
isogroup316083	17	1	9	6	0	1	2	0	6	2
isogroup320503	17	1	10	7	0	4	0	0	4	1
isogroup320239	18	0	8	6	1	0	2	1	4	4
isogroup236067	1	1	11	5	4	2	2	1	6	12
isogroup69026	3	0	10	8	1	1	0	3	14	5
isogroup327950	3	2	9	11	1	2	2	0	13	2
isogroup299195	4	2	8	14	1	2	1	2	6	5
isogroup311342	4	2	9	11	0	4	0	1	8	6
isogroup7043	5	1	5	16	1	0	4	0	6	7
isogroup74057	5	1	13	8	0	3	1	2	8	4
isogroup35849	5	3	7	4	2	4	2	8	5	5
isogroup123270	5	5	9	9	2	3	0	1	6	5
isogroup334164	5	6	4	3	7	3	2	4	1	10
isogroup225352	5	6	6	1	3	9	1	3	9	2
isogroup302634	6	0	6	16	1	1	0	0	10	5
isogroup98968	6	1	3	15	2	1	6	0	5	6
isogroup305552	6	1	8	9	0	5	5	2	5	4
isogroup86268	6	1	9	7	2	4	0	1	6	9
isogroup61136	6	1	10	7	2	2	4	1	7	5
isogroup308455	6	1	14	10	0	2	2	0	9	1
isogroup297267	6	3	3	10	2	4	2	0	7	8
isogroup410324	6	7	5	2	4	6	1	4	5	5
isogroup224579	6	9	7	3	0	10	1	4	2	3
isogroup303627	7	0	8	9	3	0	4	0	10	4
isogroup333033	7	0	13	3	0	7	0	1	10	4
isogroup326388	7	0	13	8	0	1	1	1	8	6
isogroup124639	7	1	5	11	0	1	6	1	7	6
isogroup318010	7	1	6	11	4	2	3	0	5	6
isogroup316016	7	1	8	11	2	1	0	2	6	7
isogroup150672	7	2	7	13	2	4	3	0	6	1
isogroup297193	7	3	3	16	2	1	3	0	5	5
isogroup399283	7	4	4	2	2	9	1	3	7	6
isogroup218125	7	4	4	4	1	8	3	7	3	4
isogroup45498	8	0	6	4	2	2	2	0	13	8
isogroup72055	8	0	7	6	1	2	1	2	10	8
isogroup68660	8	1	3	17	1	2	1	0	6	6
isogroup307512	8	1	8	8	2	4	1	0	8	5
isogroup66086	8	1	9	7	4	3	1	0	7	5
isogroup303834	8	1	9	8	2	2	6	0	4	5
isogroup311994	8	1	13	8	0	3	0	0	9	3
isogroup309409	8	2	5	11	1	2	3	0	6	7
isogroup316490	8	2	6	10	3	5	1	1	5	4
isogroup319270	8	3	8	7	0	3	6	2	5	3
isogroup322579	9	0	6	9	1	4	1	3	5	7
isogroup92442	9	0	10	11	0	2	0	1	7	5
isogroup315445	9	0	10	12	0	0	3	1	6	4
isogroup326608	9	0	10	13	3	0	1	2	6	1
isogroup77068	9	1	4	9	2	3	3	3	6	5
isogroup315268	9	1	8	4	1	4	0	2	6	10
isogroup331818	9	1	8	6	0	6	2	0	10	3
isogroup315368	9	2	5	10	0	2	6	0	7	4
isogroup107200	9	2	11	10	1	1	2	1	5	3
isogroup93494	9	3	9	4	0	5	4	3	4	4
isogroup314153	10	0	10	9	0	4	4	1	5	2
isogroup310488	10	0	11	10	2	2	1	0	4	5
isogroup315232	10	1	9	6	3	3	2	0	8	3
isogroup62195	10	1	9	9	1	4	1	0	5	5
isogroup307369	10	1	9	13	1	0	2	3	3	3
isogroup310205	10	1	13	4	2	3	3	0	4	5
isogroup316969	10	1	13	5	2	2	1	0	8	3
isogroup82282	10	2	11	8	1	3	0	1	6	3
isogroup68269	10	2	13	5	0	3	5	0	2	5
isogroup310888	10	3	6	11	0	0	4	2	6	3
isogroup312666	10	3	6	11	0	1	2	1	6	5
isogroup307293	10	3	10	6	0	3	0	0	8	5
isogroup298582	11	0	6	8	0	5	3	0	6	6
isogroup75294	11	0	10	8	0	1	5	1	5	4
isogroup317622	11	1	5	8	2	3	3	1	8	3
isogroup63096	11	1	6	9	2	5	1	1	7	2
isogroup319913	11	1	9	7	1	4	1	0	5	6
isogroup311370	11	1	12	2	0	5	2	1	6	5
isogroup196616	11	2	11	8	1	3	0	0	4	5
isogroup314108	11	3	11	8	0	4	0	2	4	2
isogroup323162	11	4	11	2	2	0	2	1	11	1
isogroup313627	12	0	11	10	2	2	1	0	3	4
isogroup308500	12	0	12	5	1	4	2	0	8	1
isogroup309768	12	1	4	10	1	2	0	2	9	4
isogroup315501	12	1	7	5	2	0	1	1	9	7
isogroup164784	12	1	8	6	2	4	4	0	3	5
isogroup322882	12	1	8	7	5	2	0	1	9	0
isogroup323203	12	1	11	6	1	1	0	0	8	5
isogroup325748	12	2	5	10	1	2	1	1	7	4
isogroup323595	12	2	9	5	3	4	0	1	6	3
isogroup84494	12	2	9	7	1	4	1	1	3	5
isogroup177666	12	4	1	5	2	5	3	3	8	2
isogroup62403	12	5	8	5	0	2	3	0	5	5
isogroup75803	13	0	5	15	1	2	0	1	7	1
isogroup27377	13	0	9	2	4	2	2	0	6	7
isogroup312650	13	0	13	10	2	1	3	0	1	2
isogroup156668	13	1	8	5	1	1	0	0	11	5
isogroup307700	13	1	10	6	0	3	1	3	5	3
isogroup147404	13	1	16	4	0	1	3	0	4	3
isogroup315781	13	2	7	9	0	2	2	1	7	2
isogroup72753	13	2	10	3	3	4	0	0	9	1
isogroup314408	13	3	9	10	1	2	2	0	3	2
isogroup323998	13	3	10	7	0	4	0	2	3	3
isogroup334672	14	0	6	3	1	6	1	0	10	4
isogroup323202	14	0	17	2	1	2	1	0	5	3
isogroup325535	14	1	5	10	1	4	1	1	5	3
isogroup107977	14	2	6	6	1	2	0	1	9	4
isogroup333058	14	2	14	3	1	2	1	0	2	6
isogroup228964	15	0	2	1	0	4	4	0	16	3
isogroup318673	15	0	3	12	0	1	1	1	7	5
isogroup312209	15	1	4	4	3	2	0	2	9	5
isogroup311239	15	1	11	3	6	0	1	1	5	2
isogroup312291	16	0	5	5	2	5	0	0	10	2
isogroup23904	16	0	5	8	2	0	4	0	5	5
isogroup300660	16	1	8	5	1	1	0	2	10	1
isogroup182155	16	2	3	4	0	4	1	0	13	2
isogroup71496	16	2	4	11	1	4	0	0	4	3
isogroup329283	16	2	9	7	0	1	1	1	7	1
isogroup24506	19	0	1	4	0	2	2	0	11	6
isogroup348055	20	1	6	3	2	2	1	1	8	1
isogroup364920	37	1	1	1	2	0	0	0	1	2
isogroup63809	4	0	13	14	0	0	3	1	5	6
isogroup14353	5	1	7	16	2	4	4	0	5	2
isogroup304126	5	2	8	12	3	1	0	1	9	5
isogroup332774	5	3	11	5	0	4	1	3	13	1
isogroup124583	5	6	2	4	3	10	2	6	7	1
isogroup311318	6	0	6	12	1	5	0	2	8	6
isogroup337822	6	0	9	17	0	4	2	1	4	3
isogroup332491	6	0	10	10	1	3	1	1	8	6
isogroup315467	6	2	10	10	3	1	2	2	6	4
isogroup552611	6	3	3	3	2	9	4	2	8	6
isogroup302650	6	3	6	14	4	0	1	0	7	5
isogroup297791	6	3	11	13	0	0	5	2	5	1
isogroup340999	6	4	10	9	0	2	4	1	6	4
isogroup297199	6	5	8	9	0	2	4	1	6	5
isogroup316598	7	0	7	6	1	8	5	1	6	5
isogroup209819	7	0	8	1	0	3	2	0	21	4
isogroup317580	7	1	4	11	0	1	2	1	11	8
isogroup320612	7	1	7	11	1	4	0	0	11	4
isogroup310001	7	1	10	11	1	2	2	0	8	4
isogroup1685	7	2	9	12	1	2	1	1	9	2
isogroup312279	7	3	5	10	1	1	3	3	7	6
isogroup298298	7	3	10	14	2	1	1	0	5	3
isogroup200140	7	5	1	5	0	8	5	2	8	5
isogroup258681	7	6	10	7	0	5	0	5	1	5
isogroup324501	8	0	7	7	4	0	5	0	8	7
isogroup314492	8	0	7	7	5	2	4	0	3	10
isogroup63881	8	0	9	11	1	3	2	0	8	4
isogroup304339	8	0	11	10	1	1	0	1	10	4
isogroup302212	8	1	5	8	4	2	1	1	11	5
isogroup300643	8	1	6	11	1	1	4	1	8	5
isogroup314532	8	1	8	16	2	2	4	0	4	1
isogroup73248	8	1	11	10	0	1	1	2	8	4
isogroup105932	8	2	6	13	1	3	4	0	6	3
isogroup105562	8	2	9	10	1	3	2	1	6	4
isogroup70166	8	2	10	9	1	4	2	1	3	6
isogroup223141	8	3	6	8	8	6	0	2	3	2
isogroup313039	8	3	8	11	1	1	4	0	4	6
isogroup315973	8	3	9	8	6	3	0	0	5	4
isogroup33938	8	3	10	5	1	5	4	2	6	2
isogroup314937	9	0	9	9	1	2	2	1	10	3
isogroup326311	9	0	11	9	1	1	2	1	6	6
isogroup302826	9	1	3	13	0	0	1	1	9	9
isogroup304114	9	1	4	11	4	3	3	1	4	6
isogroup313767	9	1	9	5	0	1	4	2	11	4
isogroup4183	9	1	11	12	0	0	2	0	8	3
isogroup347574	9	1	12	5	0	3	2	0	6	8
isogroup313573	9	2	8	7	0	4	0	2	7	7
isogroup302084	9	2	9	9	0	2	4	1	2	8
isogroup307306	9	2	10	8	2	2	4	1	4	4
isogroup108186	9	2	10	11	1	0	4	2	5	2
isogroup316160	9	3	6	6	3	1	4	0	10	4
isogroup36546	9	3	8	10	0	2	1	2	7	4
isogroup94548	10	1	7	7	1	3	2	2	6	7
isogroup307202	10	1	7	10	0	1	3	1	9	4
isogroup314277	10	2	8	5	1	3	4	1	11	1
isogroup76164	10	2	11	5	2	0	1	0	10	5
isogroup319864	10	2	11	8	1	1	3	0	4	6
isogroup14456	10	3	5	8	1	2	4	1	9	3
isogroup303929	10	3	6	9	2	0	3	2	9	2
isogroup310979	10	3	7	14	0	2	2	0	4	4
isogroup340583	10	4	5	6	2	4	0	2	8	5
isogroup316932	10	4	5	10	1	2	2	0	7	5
isogroup94027	10	4	5	12	0	2	2	1	5	5
isogroup315274	11	0	6	11	2	4	1	2	7	2
isogroup19385	11	0	13	2	0	2	2	3	10	3
isogroup61285	11	0	16	5	0	1	1	1	6	5
isogroup107736	11	2	9	8	1	2	0	0	9	4
isogroup314991	11	2	11	9	1	5	0	0	3	4
isogroup307956	11	2	19	2	1	3	1	1	3	3
isogroup314385	11	3	11	6	0	1	1	0	9	4
isogroup225847	12	0	2	4	0	3	3	3	12	7
isogroup165540	12	0	6	6	2	5	2	0	6	7
isogroup78816	12	0	8	8	2	2	0	1	7	6
isogroup101598	12	0	9	10	0	0	1	2	6	6
isogroup112898	12	0	11	7	0	3	0	0	8	5
isogroup1827	12	0	13	3	1	6	0	2	5	4
isogroup327333	12	1	3	9	1	1	1	3	10	5
isogroup301585	12	1	4	7	0	1	2	0	13	6
isogroup303281	12	1	9	9	1	2	1	0	7	4
isogroup303473	12	1	12	4	0	1	1	0	10	5
isogroup318882	12	2	6	7	1	3	4	0	7	4
isogroup308118	12	2	7	11	1	3	1	0	7	2
isogroup92864	12	5	9	3	2	2	3	0	5	5
isogroup315124	13	0	2	8	2	1	6	3	8	3
isogroup45037	13	0	7	8	1	1	1	0	8	7
isogroup148362	13	0	9	7	0	3	3	1	6	4
isogroup61634	13	1	7	3	1	6	1	4	3	7
isogroup320245	13	1	7	7	3	1	3	0	7	4
isogroup312180	13	1	7	8	4	1	3	1	3	5
isogroup177035	13	1	8	5	0	3	1	1	7	7
isogroup321967	13	1	8	12	0	1	3	2	6	0
isogroup10310	13	2	11	6	1	1	2	0	1	9
isogroup333597	14	0	9	6	2	4	0	0	6	5
isogroup311838	14	1	6	5	1	5	3	1	5	5
isogroup329353	14	1	7	7	0	4	2	0	7	4
isogroup309437	14	1	9	5	0	2	1	0	10	4
isogroup312643	14	1	13	5	3	0	3	1	5	1
isogroup124380	14	2	4	8	4	1	2	0	7	4
isogroup306629	14	2	5	10	3	0	1	1	7	3
isogroup58513	14	2	7	10	0	4	1	0	6	2
isogroup305739	14	3	4	12	1	4	1	1	3	3
isogroup311263	15	2	5	8	1	4	3	1	5	2
isogroup328427	15	2	7	8	1	2	1	1	6	3
isogroup320439	15	2	9	3	0	4	0	1	7	5
isogroup65086	16	0	6	9	0	4	1	0	6	4
isogroup324650	16	1	5	2	3	2	1	0	10	6
isogroup316735	16	1	8	7	1	3	0	0	2	8
isogroup305110	16	2	5	11	1	3	0	0	6	2
isogroup314417	16	2	11	7	1	0	1	2	1	5
isogroup322168	17	2	10	2	1	3	1	2	8	0
[truncated: 39,852 more rows]
